# Supplementary material for: Quantification of AICAR and study of metabolic markers after administration
Source: RSC Adv. 2024 Jun 13;14(27):19001–13. doi: 10.1039/d4ra02878c (PMC11170270; doi:10.1039/d4ra02878c)
Supplement: RA-014-D4RA02878C-s001 [file RA-014-D4RA02878C-s001.xlsx]

## Sheet: A1 VS B
Differential metabolites for A1 group vs B group
Alignment ID	KEGGID	Metabolite name	P.value	Significant	A1-1	A1-2	A1-3	A1-4	A1-5	A1-6	A1-7	A1-8	A1-9	A1-10	B-1	B-2	B-3	B-4	B-5	B-6	B-7	B-8	B-9	B-10	FC	Log2FC	Mean.After1	Mean.Before	PLSDA.VIP	HMDBID	Superclass	Class
NEG502	---	3-Hydroxy-2H-pyran-2-one	5.03376e-06	UP	8.0325e+07	9.79297e+07	1.34952e+08	1.45458e+08	2.15919e+08	2.65439e+08	2.55115e+08	2.22684e+08	1.90934e+08	2.18799e+08	4.73845e+07	5.52065e+07	4.04413e+07	1.25354e+07	1.54111e+07	4.91757e+07	2.49008e+07	3.36976e+07	1.03604e+08	3.85184e+07	4.34227	2.11845	1.82755e+08	4.20875e+07	2.56535	HMDB0032994	Organoheterocyclic compounds	Pyrans
POS6206	C04663	Acadesine	2.92746e-05	UP	1.16952e+09	7.47781e+08	1.08589e+09	2.97536e+08	7.29335e+08	1.04625e+09	3.86212e+08	3.01524e+08	6.0904e+08	3.24407e+08	1.5047e+08	8.38582e+07	1.85384e+07	2.01543e+07	3.75874e+07	4.85241e+07	6.8242e+07	5.88426e+07	8.95989e+07	9.19098e+07	10.0303	3.32629	6.69749e+08	6.67726e+07	2.47463	HMDB0062179	Nucleosides, nucleotides, and analogues	Imidazole ribonucleosides and ribonucleotides
POS13111	---	PC(18:1/14:0)	5.5576e-05	DOWN	1.51523e+07	1.36181e+07	1.79577e+07	6.95095e+06	4.32166e+06	4.7263e+06	4.32029e+06	2.71726e+06	3.9388e+06	2.30599e+06	3.18597e+07	4.90951e+07	6.13578e+07	4.25159e+07	4.54299e+07	4.02736e+07	5.45635e+07	2.81038e+07	1.18928e+07	9.79772e+06	0.202751	-2.30222	7.60094e+06	3.7489e+07	2.3932	HMDB0008097	Lipids and lipid-like molecules	Glycerophospholipids
POS1701	C19434	Oxyquinoline	3.73031e-05	UP	1.23008e+08	140163140	1.5182e+08	1.47626e+08	1.91337e+08	1.58076e+08	1.55853e+08	1.66079e+08	1.86338e+08	1.87034e+08	1.11613e+08	1.05167e+08	1.23965e+08	1.08404e+08	1.02349e+08	1.25278e+08	1.19011e+08	1.21091e+08	1.38174e+08	1.26051e+08	1.36088	0.444536	1.60733e+08	1.1811e+08	2.4254	---	Organoheterocyclic compounds	Quinolines and derivatives
POS13120	---	PC(16:0/16:0)	6.71575e-05	DOWN	2.20467e+08	1.52137e+08	1.93809e+08	2.43688e+08	1.26806e+08	6.55503e+07	5.76202e+07	7.3824e+07	8.0935e+07	2.1025e+07	6.00877e+08	7.24347e+08	7.98422e+08	4.79479e+08	5.11736e+08	2.54769e+08	2.79167e+08	8.76088e+08	2.86063e+08	3.42551e+08	0.23981	-2.06003	1.23586e+08	5.1535e+08	2.37753	HMDB0000564	Lipids and lipid-like molecules	Glycerophospholipids
POS13328	---	PC(18:1/16:0)	0.000127037	DOWN	1.24304e+09	1.33046e+09	7.72556e+08	8.75523e+08	9.35058e+08	7.17144e+08	4.93412e+08	4.26138e+08	8.44299e+08	4.45557e+08	4.24217e+09	3.88425e+09	4.37822e+09	1.70174e+09	3.0467e+09	2.98591e+09	5.40944e+09	3.72732e+09	9.50129e+08	1.08726e+09	0.257319	-1.95837	8.08318e+08	3.14131e+09	2.33128	HMDB0008100	Lipids and lipid-like molecules	Glycerophospholipids
POS13857	---	PC(18:0/20:4)	0.000169942	DOWN	5.19519e+07	5.94695e+07	3.72636e+07	4.67456e+07	3.57854e+07	3.53407e+07	2.78987e+07	3.46256e+07	5.39589e+07	2.84678e+07	7.32939e+07	8.68813e+07	9.01184e+07	5.8094e+07	1.09912e+08	1.04805e+08	9.56945e+07	8.10261e+07	4.29304e+07	4.93222e+07	0.519529	-0.944723	4.11508e+07	7.92078e+07	2.30468	HMDB0008048	Lipids and lipid-like molecules	Glycerophospholipids
POS3566	---	5,6-Dihydroxy-2-methylaminotetralin	0.000239604	UP	1.0855e+08	1.3888e+08	1.1038e+08	1.05798e+08	1.05231e+08	8.95524e+07	8.94634e+07	9.04576e+07	1.76066e+08	9.78972e+07	41860358	5.52365e+07	7.15809e+07	5.8889e+07	5.96583e+07	6.17388e+07	8.77137e+07	9.41733e+07	6.21412e+07	6.96974e+07	1.67842	0.747108	1.11227e+08	6.62689e+07	2.26356	HMDB0246248	Benzenoids	Tetralins
POS1894	---	3-Methoxy-4-hydroxyphenylethanol	0.000296126	DOWN	7.87704e+06	7.979e+06	3.42713e+06	4.90374e+06	6.18083e+06	7.90362e+07	4.5287e+06	9.71678e+06	6.1094e+06	8.5793e+06	3.97836e+07	4.68175e+07	3.84792e+07	4.1161e+07	4.08663e+07	7.66807e+07	5.37927e+07	6.35028e+07	8.26065e+07	9.99101e+07	0.237043	-2.07678	1.38338e+07	5.836e+07	2.31503	HMDB0038925	Benzenoids	Phenols
POS495	---	Di-N-propylamine	0.000410358	UP	6.00887e+08	7.5654e+08	5.67934e+08	5.16324e+08	5.51154e+08	4.8953e+08	4.59019e+08	4.6699e+08	9.68163e+08	5.12374e+08	2.45909e+08	3.09277e+08	3.87536e+08	3.23708e+08	2.65889e+08	2.79491e+08	3.91021e+08	5.47224e+08	3.24208e+08	3.44552e+08	1.7225	0.784505	5.88892e+08	3.41882e+08	2.20509	HMDB0302261	Organic nitrogen compounds	Organonitrogen compounds
POS11815	---	22-Hydoxy-2-hopen-1-one	0.00058702	UP	7.02256e+07	8.2477e+07	7.29845e+07	7.29855e+07	4.2343e+07	6.13884e+07	5.35781e+07	7.28471e+07	136246188	6.46346e+07	1.40169e+07	1.76654e+07	3.03244e+07	3.16976e+07	3.20362e+07	3.45612e+07	5.30584e+07	4.04373e+07	4.94699e+07	5.24853e+07	2.05117	1.03645	7.2971e+07	3.55753e+07	2.16017	---	Lipids and lipid-like molecules	Prenol lipids
NEG5374	---	Polyethylene, oxidized	0.000404558	UP	4.243e+08	2.44461e+08	2.26541e+08	1.75468e+08	2.50173e+08	3.02379e+08	2.07715e+08	2.45908e+08	1.61711e+08	1.03598e+08	8.34234e+07	8.66974e+07	1.4081e+08	1.46125e+08	8.31747e+07	1.65721e+08	1.21557e+08	9.81035e+07	6.82174e+07	6.7476e+07	2.20695	1.14206	2.34225e+08	1.06131e+08	2.2075	HMDB0032472	Organic acids and derivatives	Keto acids and derivatives
NEG4383	---	N-Acetyltyrosine	0.000578611	UP	5.84456e+07	4.46605e+07	2.87391e+07	2.20497e+07	5.6288e+07	3.90616e+07	5.32974e+07	6.77319e+07	5.61932e+07	5.54474e+07	2.06987e+07	4.83922e+07	5.86518e+06	5.90677e+06	1.35076e+07	2.79618e+07	2.46219e+07	2.87626e+07	2.84619e+07	2.61808e+07	2.09201	1.06489	4.81914e+07	2.30359e+07	2.16979	HMDB0000866	Organic acids and derivatives	Carboxylic acids and derivatives
POS2391	---	Dimethylamphetamine	0.000690063	UP	1.84109e+08	1.58783e+08	2.57764e+08	1.02444e+08	1.00717e+08	8.81798e+07	1.20696e+08	1.03403e+08	2.57225e+08	9.07705e+07	5.1915e+07	4.93461e+07	4.73373e+07	4.61793e+07	7.412e+07	5.85215e+07	8.75903e+07	6.91837e+07	6.52435e+07	3.87173e+07	2.4893	1.31574	1.46409e+08	5.88154e+07	2.16218	HMDB0041880	Benzenoids	Benzene and substituted derivatives
POS2935	---	2-Benzimidazolecarbamic acid	0.00158827	UP	4.85412e+08	3.85681e+08	4.22895e+08	2.45417e+08	2.94508e+08	1.97092e+08	7.21508e+08	5.22572e+08	4.44927e+08	3.25934e+08	1.69504e+08	2.49918e+08	2.27974e+08	3.171e+08	2.40069e+08	1.99188e+08	1.84382e+08	1.9095e+08	1.8017e+08	2.20074e+08	1.85651	0.892593	4.04595e+08	2.17933e+08	2.02759	HMDB0248994	Organoheterocyclic compounds	Benzimidazoles
POS2945	---	4-Hexylaniline	0.00117891	UP	1.37558e+08	2.0063e+08	1.4749e+08	1.77071e+08	1.7526e+08	1.24353e+08	1.28884e+08	1.30934e+08	2.22724e+08	1.47603e+08	7.88234e+07	9.97168e+07	1.36233e+08	1.19286e+08	9.40185e+07	1.02118e+08	1.23364e+08	1.52822e+08	7.87801e+07	1.08002e+08	1.45679	0.542792	1.59251e+08	1.09316e+08	2.08961	---	Benzenoids	Benzene and substituted derivatives
POS7657	C18739	Enilconazole	0.00138445	UP	3.67431e+08	6.91752e+07	1.49296e+08	1.53814e+08	1.87371e+08	3.1004e+08	6.16034e+07	8.01022e+07	2.83372e+07	4.19498e+07	1.24699e+06	655022	6.3555e+06	8.45372e+06	3.57688e+06	1.85972e+07	6.73696e+06	1.64634e+07	4.04543e+06	3.84253e+06	20.7095	4.37222	1.44912e+08	6.99736e+06	2.06901	HMDB0031794	Benzenoids	Benzene and substituted derivatives
POS6117	---	5-butyl-3-methyl-7H-furo[3,2-g]chromen-7-one	0.00164007	UP	5.1327e+07	4.72792e+07	1.091e+09	9.7127e+08	1.18354e+08	1.44967e+09	1.206e+09	1.29498e+09	9.65586e+08	9.15608e+08	4.95909e+07	2.30027e+07	8.29508e+08	3.77685e+07	2.60222e+07	4.63573e+07	6.8838e+07	4.16045e+07	4.04405e+07	4.04288e+07	6.73923	2.75258	8.11108e+08	1.20356e+08	2.02994	---	Phenylpropanoids and polyketides	Coumarins and derivatives
NEG3582	---	Zeanic acid	0.00143261	UP	1.44404e+08	1.34541e+08	1.56021e+08	1.55782e+08	1.99794e+08	2.1612e+08	1.20469e+08	1.13529e+08	1.07203e+08	1.11287e+08	8.91363e+07	1.10115e+08	2.32134e+07	6.30241e+07	8.39806e+07	1.57614e+08	1.03978e+08	7.32243e+07	3.33124e+07	8.4022e+07	1.77594	0.828586	1.45915e+08	8.2162e+07	2.0442	HMDB0032963	Organoheterocyclic compounds	Quinolines and derivatives
POS2211	C14789	N-Hydroxy-1-aminonaphthalene	0.000998443	DOWN	8.2334e+06	2.97065e+07	1.91297e+07	5.89644e+07	1.50034e+07	1.94914e+07	4.88295e+06	1.54759e+07	1.06978e+07	1.189e+07	4.92652e+07	3.23337e+07	8.64844e+07	5.0859e+07	7.50044e+07	5.48522e+07	3.7871e+07	4.22562e+07	1.1684e+08	1.44346e+08	0.280354	-1.83468	1.93476e+07	6.90112e+07	2.0958	HMDB0062503	Benzenoids	Naphthalenes
POS979	---	3-Aminopicolinaldehyde	0.00235266	DOWN	2.09895e+08	3.17159e+08	1.90087e+08	1.86668e+08	2.08776e+08	1.61742e+08	2.18977e+08	2.30346e+08	1.71058e+08	1.91105e+08	2.98195e+08	3.85185e+08	1.51577e+08	1.05224e+09	7.76458e+08	6.15151e+08	4.98428e+08	3.95102e+08	4.94871e+08	3.53513e+08	0.415441	-1.26729	2.08581e+08	5.02072e+08	1.97234	HMDB0245820	Organoheterocyclic compounds	Pyridines and derivatives
POS1366	---	Benzothiazole	0.00191857	UP	8.98689e+07	1.04541e+08	8.72283e+07	9.50991e+07	1.06305e+08	9.19597e+07	8.02461e+07	7.94755e+07	1.76331e+08	9.29859e+07	4.84381e+07	4.96194e+07	6.56869e+07	5.86887e+07	5.09528e+07	7.18334e+07	9.56074e+07	7.50412e+07	5.01058e+07	7.15073e+07	1.57501	0.655363	1.00404e+08	6.37481e+07	2.00085	HMDB0032930	Organoheterocyclic compounds	Benzothiazoles
NEG5481	---	3-Hydroxydodecanedioic acid	0.00142441	UP	2.40543e+08	2.11198e+08	1.60812e+08	1.09144e+08	1.52668e+08	2.91411e+08	1.94756e+08	1.55836e+08	1.52769e+08	1.28782e+08	4.32118e+07	5.25659e+07	5.73378e+07	1.46437e+08	6.47929e+07	1.46446e+08	1.01776e+08	1.61434e+08	1.10485e+08	7.70056e+07	1.86993	0.902983	1.79792e+08	9.61491e+07	2.04239	HMDB0000413	Organic acids and derivatives	Hydroxy acids and derivatives
NEG445	C01403	Anisole	0.00194605	UP	1.29883e+08	1.27686e+08	1.63195e+08	1.6615e+08	2.30985e+08	2.21016e+08	1.85858e+08	1.75456e+08	1.25881e+08	1.33737e+08	8.2476e+07	9.81486e+07	7.63404e+07	1.00621e+08	1.09257e+08	1.76308e+08	1.32126e+08	1.03854e+08	8.09378e+07	1.36528e+08	1.51363	0.598017	1.65985e+08	1.0966e+08	2.00412	HMDB0033895	Benzenoids	Phenol ethers
POS1866	---	5-Butyl-2-methylpyridine	0.00205149	UP	2.44401e+09	2.73441e+09	2.43788e+09	2.74941e+09	2.80118e+09	1.93117e+09	1.9516e+09	2.23249e+09	3.6942e+09	2.39391e+09	1.38727e+09	1.52118e+09	2.18245e+09	1.96518e+09	1.54627e+09	1.52887e+09	2.12239e+09	2.53523e+09	1.77464e+09	1.65272e+09	1.39273	0.477916	2.53703e+09	1.82162e+09	2.00997	HMDB0246758	Organoheterocyclic compounds	Pyridines and derivatives
POS2009	---	4-Deoxypyridoxine	0.00331196	DOWN	5.4559e+07	4.8586e+07	4.3149e+07	4.41235e+07	4.64693e+07	5.5781e+07	5.57505e+07	4.51505e+07	5.11447e+07	5.22932e+07	5.26509e+07	4.83664e+07	7.41979e+07	6.56382e+07	5.20068e+07	7.12035e+07	5.9441e+07	9.68122e+07	7.50424e+07	6.39127e+07	0.753872	-0.407609	4.97007e+07	6.59272e+07	1.99738	HMDB0246408	Organoheterocyclic compounds	Pyridines and derivatives
NEG5343	---	P-Sulfoxycinnamic Acid	0.00448938	DOWN	3.5606e+07	4.02818e+07	7.40753e+07	7.47093e+07	4.01499e+07	4.81775e+07	2.76407e+07	5.79605e+07	3.41942e+07	7.49146e+07	3.28214e+07	7.08736e+07	4.56089e+07	1.95133e+08	1.66061e+08	8.59553e+07	1.22449e+08	1.07157e+08	1.19691e+08	1.10251e+08	0.480786	-1.05653	5.0771e+07	1.056e+08	1.87122	HMDB0125166	Phenylpropanoids and polyketides	Cinnamic acids and derivatives
POS13279	---	PC(16:0/18:2)	0.00232251	DOWN	5.56776e+06	1.64494e+07	6.97121e+06	4.98549e+06	7.64999e+06	3.15524e+06	1.90201e+06	2.975e+06	3.75701e+06	1.63902e+06	3.14929e+07	4.8773e+07	2.47624e+07	1.25276e+07	2.47492e+07	2.02431e+07	1.42575e+07	1.12466e+07	1.15522e+07	5.60397e+06	0.268274	-1.89822	5.50521e+06	2.05208e+07	1.97395	HMDB0007973	Lipids and lipid-like molecules	Glycerophospholipids
NEG2862	C08261	Azelaic acid	0.00359761	UP	5.09286e+09	2.19167e+09	2.96728e+09	1.73546e+09	3.90006e+09	3.99995e+09	3.60052e+09	2.93736e+09	1.73063e+09	1.56819e+09	1.44461e+09	1.2141e+09	2.00435e+09	1.77137e+09	1.1225e+09	3.0627e+09	1.38273e+09	1.64955e+09	6.07642e+08	1.19846e+09	1.92289	0.943273	2.9724e+09	1.5458e+09	1.90652	HMDB0000784	Lipids and lipid-like molecules	Fatty Acyls
POS7171	---	Hexaethylene glycol	0.00370091	DOWN	4.92995e+07	8.92652e+07	8.44862e+07	8.34921e+07	7.73613e+07	5.33733e+07	28379961	5.58256e+07	7.01028e+07	4.97997e+07	3.56007e+07	5.1713e+07	1.0092e+08	1.14438e+08	2.70913e+08	2.20401e+08	2.11852e+08	1.33332e+08	1.35634e+08	2.36856e+08	0.424293	-1.23687	6.41386e+07	1.51166e+08	1.9274	HMDB0061822	Organic oxygen compounds	Organooxygen compounds
POS3343	C00612	N1-Acetylspermidine	0.0064581	UP	1.1551e+08	9.87527e+07	6.8256e+07	5.29932e+07	6.77963e+07	52632581	5.22507e+07	9.7805e+07	1.02899e+08	6.0186e+07	3.75335e+07	4.40353e+07	6.42865e+07	3.54176e+07	3.46052e+07	4.25035e+07	4.46687e+07	5.85904e+07	7.56713e+07	5.94467e+07	1.5482	0.63059	7.69081e+07	4.96759e+07	1.80941	HMDB0001276	Organic acids and derivatives	Carboximidic acids and derivatives
NEG3114	---	Aminohippuric acid	0.00463964	UP	1.10515e+08	1.83916e+08	1.57058e+08	1.69442e+08	1.4268e+08	1.42612e+08	7.74631e+07	1.17119e+08	1.46632e+08	1.10686e+08	3.23832e+07	3.13355e+07	1.01804e+08	7.07812e+07	1.16219e+08	1.349e+08	8.23078e+07	1.0383e+08	6.65223e+07	1.24706e+08	1.57047	0.651194	1.35812e+08	8.64789e+07	1.8934	HMDB0001867	Benzenoids	Benzene and substituted derivatives
NEG596	C00122	Fumaric acid	0.00542385	DOWN	8.82335e+06	1.32311e+07	2.77207e+07	2.7824e+06	6.51151e+07	2.58561e+06	6.84978e+07	8.01373e+06	5.65591e+06	4.30097e+06	7.17875e+06	2.89437e+07	8.7583e+07	7.87548e+07	5.20854e+07	9.05784e+07	5.84714e+07	7.76819e+07	3.05104e+07	7.62308e+07	0.351565	-1.50814	2.06727e+07	5.88019e+07	1.91551	HMDB0000134	Organic acids and derivatives	Carboxylic acids and derivatives
POS3450	C11052	7-Ethoxycoumarin	0.00463741	UP	1.33698e+08	6.25009e+07	1.11602e+08	3.53857e+07	1.03692e+08	3.12373e+07	1.79696e+08	1.24944e+08	2.65579e+08	1.21708e+08	7.1716e+06	4.81532e+07	69275074	1.15098e+08	2.51867e+07	1.94744e+07	3.1023e+07	2.90875e+07	2.55452e+07	1.80858e+07	3.01479	1.59206	1.17004e+08	3.88101e+07	1.86508	HMDB0247248	Phenylpropanoids and polyketides	Coumarins and derivatives
POS1412	C02918	1-Methylnicotinamide	0.00363576	DOWN	7.9293e+08	9.56401e+08	1.17367e+09	7.13749e+08	6.61753e+08	4.4539e+08	3.23428e+08	7.94159e+08	5.82305e+08	4.94743e+08	7.18814e+08	8.0572e+08	1.49659e+09	8.38946e+08	1.74191e+09	8.45905e+08	1.19852e+09	1.17392e+09	1.86253e+09	1.29025e+09	0.579509	-0.787096	6.93852e+08	1.19731e+09	1.9044	HMDB0000699	Organoheterocyclic compounds	Pyridines and derivatives
POS7425	C01227	Dehydroepiandrosterone	0.00424633	DOWN	2.54108e+07	3.30551e+07	4.09931e+07	3.27008e+07	4.91069e+07	4.79018e+07	3.38825e+07	5.73712e+07	4.41167e+07	76111900	9.05552e+07	1.12961e+08	1.83095e+08	1.32671e+08	2.00595e+08	6.15711e+07	5.18531e+07	5.13151e+07	2.70956e+08	6.86407e+07	0.359946	-1.47415	4.40651e+07	1.22421e+08	1.87944	HMDB0000077	Lipids and lipid-like molecules	Steroids and steroid derivatives
NEG751	C00180	Benzoic acid	0.00440946	UP	5.39518e+07	5.16731e+07	2.89579e+07	2.90979e+07	4.33318e+07	4.70572e+07	9.20466e+07	5.48575e+07	4.36256e+07	6.62287e+07	1.6237e+07	2.72606e+07	2.46059e+07	2.17244e+07	1.41526e+07	5.04454e+07	2.65936e+07	4.14124e+07	3.94659e+07	2.57998e+07	1.77557	0.828285	5.10828e+07	2.87698e+07	1.89979	HMDB0001870	Benzenoids	Benzene and substituted derivatives
NEG5090	---	1-Carboxyethylphenylalanine	0.00492702	UP	1.37711e+08	1.03666e+08	9.50065e+07	6.53554e+07	1.10054e+08	1.00366e+08	228587524	1.41577e+08	1.24873e+08	1.63299e+08	1.13616e+08	1.05723e+08	3.86012e+07	7.7388e+07	7.42391e+07	9.05345e+07	7.55781e+07	5.46054e+07	5.458e+07	7.15231e+07	1.67969	0.748193	1.2705e+08	7.56388e+07	1.85833	HMDB0240628	Organic acids and derivatives	Carboxylic acids and derivatives
POS3871	C20262	Zerumbone	0.00808138	DOWN	2.1721e+07	2.44761e+07	1.66233e+07	1.78762e+07	1.70713e+07	1.66702e+07	8.50755e+06	1.68897e+07	1.34067e+07	4.1007e+07	2.70532e+07	7.90084e+07	2.78538e+07	6.09769e+07	3.14987e+07	1.44168e+07	4.78139e+07	7.22714e+07	1.9553e+07	3.93644e+07	0.462706	-1.11183	1.94249e+07	4.1981e+07	1.76943	HMDB0245523	Lipids and lipid-like molecules	Prenol lipids
POS13329	---	PC(16:0/18:1)	0.00539186	DOWN	2.58866e+08	2.54196e+08	1.69635e+08	2.29225e+08	2.75929e+08	5.85174e+07	1.51712e+08	1.07252e+08	2.49635e+08	2.61374e+07	5.16177e+08	6.79857e+08	5.80925e+08	7.43802e+08	3.48241e+08	5.04824e+08	2.9095e+08	2.03721e+08	1.81868e+08	1.09271e+08	0.428187	-1.22369	1.7811e+08	4.15964e+08	1.83959	HMDB0007972	Lipids and lipid-like molecules	Glycerophospholipids
NEG2344	C08278	Suberic acid	0.00623697	UP	1.30643e+09	7.23922e+08	8.44276e+08	1.02229e+09	1.37343e+09	2.03184e+09	1.42436e+09	1.5054e+09	6.99202e+08	9.27073e+08	6.873e+08	6.08219e+08	6.73907e+08	6.87624e+08	4.51633e+08	1.27597e+09	6.64923e+08	7.66445e+08	7.31476e+08	7.09746e+08	1.63398	0.708394	1.18582e+09	7.25724e+08	1.83077	HMDB0000893	Lipids and lipid-like molecules	Fatty Acyls
NEG6135	---	Glutamylleucine	0.00665891	UP	2.06538e+08	1.80951e+08	7.94694e+07	1.90683e+08	2.54065e+08	3.11262e+08	3.14588e+08	1.29932e+08	1.12018e+08	1.31661e+08	1.0467e+08	1.18424e+08	3.92129e+07	4.14356e+07	9.67325e+07	1.81691e+08	6.92479e+07	9.64306e+07	5.89806e+07	1.75941e+08	1.94468	0.959533	1.91117e+08	9.82767e+07	1.81739	HMDB0011171	Organic acids and derivatives	Carboxylic acids and derivatives
POS5017	---	N,N,N-Trimethyl-L-alanyl-L-proline betaine	0.00456556	UP	4.29566e+08	8.25161e+08	9.38779e+08	9.37622e+08	1.35287e+09	1.03717e+09	9.95556e+08	1.14475e+09	7.48068e+08	1.19101e+09	3.6261e+08	4.36378e+08	3.81714e+08	6.00221e+08	6.75317e+08	8.75107e+08	7.556e+08	9.05906e+08	5.2962e+08	7.57789e+08	1.52869	0.612293	9.60056e+08	6.28026e+08	1.86789	HMDB0240365	Organic acids and derivatives	Carboxylic acids and derivatives
POS6152	---	3'-O-Methylcytidine	0.00908013	UP	1.08955e+08	1.73944e+08	1.69065e+08	2.41079e+08	1.19391e+08	2.51472e+08	9.11562e+07	1.31085e+08	1.26869e+08	1.56459e+08	9.86493e+07	4.52535e+07	1.4269e+08	6.18936e+07	5.84654e+07	1.30342e+08	8.01694e+07	5.71082e+07	6.4834e+07	1.80979e+08	1.70524	0.769974	1.56948e+08	9.20384e+07	1.78764	---	Nucleosides, nucleotides, and analogues	Pyrimidine nucleosides
POS803	---	1-Pyrrolidineethanol	0.0134551	UP	4.60895e+08	6.82925e+08	4.44108e+08	5.63098e+08	5.1337e+08	4.62194e+08	3.22314e+08	7.54294e+08	5.88634e+08	5.94145e+08	3.26903e+08	4.54745e+08	3.46703e+08	3.3034e+08	4.1868e+08	3.77826e+08	3.08167e+08	2.55795e+08	5.36733e+08	5.98394e+08	1.36206	0.445791	5.38598e+08	3.95429e+08	1.68513	HMDB0245748	Organoheterocyclic compounds	Pyrrolidines
POS1700	C08493	Indole-3-carboxyaldehyde	0.00824053	UP	6.50781e+08	6.34819e+08	7.03636e+08	6.70483e+08	9.5472e+08	7.67895e+08	9.65109e+08	8.23479e+08	6.01182e+08	7.41417e+08	5.2756e+08	7.1767e+08	4.66225e+08	4.60265e+08	5.16017e+08	6.94488e+08	5.4752e+08	6.89565e+08	5.90077e+08	7.39294e+08	1.26306	0.336919	7.51352e+08	5.94868e+08	1.80167	HMDB0029737	Organoheterocyclic compounds	Indoles and derivatives
NEG79	---	2-Cyanoacetamide	0.00933517	UP	2.52743e+08	2.11331e+08	2.23662e+08	3.02044e+08	2.97807e+08	2.41913e+08	1.39365e+08	1.65723e+08	3.61112e+08	1.97704e+08	1.86023e+08	2.86247e+08	1.3053e+08	2.30522e+08	1.4654e+08	1.05614e+08	1.53275e+08	1.06528e+08	1.02228e+08	1.04422e+08	1.54221	0.625001	2.3934e+08	1.55193e+08	1.80334	HMDB0245084	Organic acids and derivatives	Carboxylic acids and derivatives
POS1389	---	Cumidine	0.00814008	UP	1.92118e+09	2.29678e+09	2.05175e+09	2.42474e+09	2.36265e+09	1.69902e+09	1.54242e+09	1.94055e+09	3.20987e+09	1.64422e+09	1.20614e+09	1.22493e+09	1.92401e+09	1.67615e+09	1.31873e+09	1.3036e+09	1.8622e+09	2.20949e+09	1.13723e+09	1.46457e+09	1.37621	0.460696	2.10932e+09	1.53271e+09	1.78	HMDB0062481	Benzenoids	Benzene and substituted derivatives
POS4772	---	3,5-Diisopropylsalicylic acid	0.0110038	UP	1.88325e+07	2.09219e+07	1.24194e+07	1.77027e+07	1.36613e+07	1.79495e+07	1.60473e+07	1.38889e+07	1.09984e+07	1.84651e+07	6.00793e+06	1.44643e+07	1.17268e+07	8.40815e+06	1.13323e+07	1.76682e+07	1.21698e+07	6.4655e+06	9.88382e+06	1.68411e+07	1.39941	0.484817	1.60887e+07	1.14968e+07	1.71477	HMDB0246059	Benzenoids	Benzene and substituted derivatives
POS4602	---	Curcumol	0.0116976	DOWN	2.64781e+07	2.53017e+07	1.8216e+07	1.96795e+07	1.37218e+07	1.65079e+07	1.58283e+07	2.60894e+07	2.41905e+07	5.47137e+07	2.33815e+07	5.94053e+07	3.39947e+07	5.05097e+07	2.98447e+07	2.52765e+07	3.49669e+07	7.14593e+07	3.4587e+07	5.37014e+07	0.577107	-0.79309	2.40727e+07	4.17127e+07	1.70918	HMDB0038122	Organooxygen compounds	Prenol lipids
NEG650	C01826	Norvaline	0.0118182	UP	5.12576e+07	6.2752e+07	4.25692e+07	4.28376e+07	5.90629e+07	6.69946e+07	4.77672e+07	6.23177e+07	4.74938e+07	4.72254e+07	23103507	2.57131e+07	3.54371e+07	1.23281e+07	2.60206e+07	5.77384e+07	3.68923e+07	5.41704e+07	4.01352e+07	5.82003e+07	1.4342	0.520242	5.30278e+07	3.69739e+07	1.73388	HMDB0013716	Organic acids and derivatives	Carboxylic acids and derivatives
POS13386	---	PC(16:0/18:0)	0.0114209	DOWN	7.6634e+07	8.71537e+07	6.0498e+07	6.79442e+07	5.82484e+07	5.26213e+07	3.06861e+07	4.57815e+07	6.69296e+07	4.0954e+07	8.56399e+07	8.54328e+07	7.62311e+07	9.20176e+07	7.87368e+07	7.65038e+07	9.13987e+07	8.69906e+07	4.53794e+07	6.56679e+07	0.749301	-0.416383	5.87451e+07	7.83999e+07	1.70689	HMDB0007970	Lipids and lipid-like molecules	Glycerophospholipids
NEG1559	C05852	2-Hydroxyphenylacetic acid	0.0100158	UP	1.17291e+08	1.10075e+08	1.22615e+08	1.13342e+08	1.71225e+08	1.90365e+08	1.16222e+08	1.1336e+08	1.1437e+08	1.13587e+08	9.08468e+07	1.33355e+08	7.65503e+07	8.29527e+07	8.86171e+07	1.25087e+08	1.06326e+08	9.46472e+07	7.73987e+07	9.59106e+07	1.31981	0.400334	1.28245e+08	9.71691e+07	1.73106	HMDB0000669	Benzenoids	Benzene and substituted derivatives
NEG3155	C12271	N-Acetyldopamine	0.0128724	UP	6.17805e+07	6.07993e+07	4.1898e+07	4.19547e+07	4.31788e+07	4.96224e+07	4.14464e+07	4.38481e+07	7.77553e+07	3.12747e+07	3.45444e+07	3.67864e+07	2.92495e+07	2.51997e+07	2.47743e+07	3.67661e+07	5.62876e+07	46186342	2.22927e+07	3.17464e+07	1.43546	0.52151	4.93558e+07	3.43833e+07	1.68196	HMDB0041943	Benzenoids	Phenols
POS2835	C20127	alpha-Methyltryptamine	0.0131751	UP	2.99218e+07	2.9112e+07	3.54336e+07	4.09236e+07	2.93137e+07	2.44084e+07	2.44436e+07	3.70998e+07	5.57777e+07	2.38192e+07	1.44627e+07	2.28628e+07	2.10603e+07	4.35087e+07	2.01859e+07	1.44383e+07	2.0648e+07	2.40895e+07	1.45647e+07	2.15585e+07	1.51925	0.603359	3.30253e+07	2.17379e+07	1.71296	HMDB0245770	Organoheterocyclic compounds	Indoles and derivatives
POS2329	---	1-(2,4-Dimethoxyphenyl)ethanone	0.00895456	UP	2.34575e+07	2.09506e+07	1.19992e+08	9.37172e+07	1.124e+08	1.02115e+08	7.63454e+07	4.60399e+07	5.33301e+07	4.15048e+07	9.73167e+06	9.99804e+06	3.17597e+07	4.7241e+07	1.72343e+07	5.3866e+07	5.89718e+07	3.59322e+07	8.37796e+06	3.4096e+07	2.24555	1.16707	6.89852e+07	3.07209e+07	1.75743	---	Organic oxygen compounds	Organooxygen compounds
POS1800	---	5,6,7,8-Tetrahydro-4-methylquinoline	0.0141837	UP	4.95688e+07	5.94345e+07	8.17218e+07	8.89125e+07	7.31427e+07	4.73091e+07	4.82845e+07	7.00459e+07	1.46273e+08	5.13512e+07	2.91003e+07	4.72561e+07	4.36361e+07	6.56109e+07	3.56504e+07	2.66582e+07	5.26881e+07	5.89741e+07	3.43271e+07	4.12939e+07	1.64534	0.718386	7.16044e+07	4.35195e+07	1.6734	HMDB0029709	Organoheterocyclic compounds	Quinolines and derivatives
POS508	C08057	DL-Cycloserine	0.0147965	UP	1.07244e+09	7.2443e+08	9.39874e+08	7.14701e+08	1.1718e+09	1.00066e+09	1.79504e+09	1399894421	9.19797e+08	1.04509e+09	7.01743e+08	8.56538e+08	7.48331e+08	558959627	5.47398e+08	8.86147e+08	6.29342e+08	8.28534e+08	1.00725e+09	9.50303e+08	1.39784	0.483203	1.07837e+09	7.71455e+08	1.70913	HMDB0014405	Organoheterocyclic compounds	Azolines
POS6159	---	3-Methylcytidine	0.0141074	UP	9.00024e+06	2.56434e+07	2.6117e+07	18018550	1.907e+07	2.08682e+07	2.07337e+07	1.57095e+07	3.43372e+07	1.55501e+07	1.80327e+07	7.67762e+06	1.29018e+07	1.11835e+07	1.14613e+07	1.47362e+07	1.7017e+07	1.7898e+07	1.11422e+07	1.6044e+07	1.48484	0.570307	2.05048e+07	1.38094e+07	1.66171	HMDB0240577	Nucleosides, nucleotides, and analogues	Pyrimidine nucleosides
POS4329	---	N-Acetyl-3-methylhistidine	0.0162768	UP	1.69812e+08	1.03732e+08	9.7638e+07	6.22962e+07	1.00493e+08	1.03559e+08	1.02068e+08	5.36994e+07	2.24925e+08	8.16013e+07	2.60811e+07	1.55334e+07	2.90375e+07	3.34472e+07	4.38698e+07	5.20169e+07	9.31908e+07	6.69421e+07	1.1274e+08	1.07005e+08	1.89669	0.923485	1.09982e+08	5.79864e+07	1.63547	HMDB0240341	Organic acids and derivatives	Carboxylic acids and derivatives
POS8232	---	2-trans,4-cis-Decadienoylcarnitine	0.0186535	DOWN	1.35892e+08	1.54141e+08	9.94738e+08	3.76034e+08	1.37855e+08	1.06071e+08	4.58986e+07	7.03565e+07	4.83861e+07	1.02731e+08	3.12542e+09	4.73658e+08	3.81157e+08	3.8768e+09	1.37029e+09	4.33527e+08	1.48802e+09	2.63699e+08	9.69665e+08	3.7311e+08	0.17029	-2.55394	2.1721e+08	1.27553e+09	1.63154	HMDB0013325	Lipids and lipid-like molecules	Fatty Acyls
POS1181	---	3-Methylene-indolenine	0.0209216	UP	2.57674e+08	1.47575e+08	1.37103e+08	1.19394e+08	1.5908e+08	1.21484e+08	1.52159e+08	5.13849e+08	4.07767e+08	2.07887e+08	4.24657e+07	5.47021e+07	1.22466e+08	1.23401e+08	6.69023e+07	1.01823e+08	7.26032e+07	1.02027e+08	2.43912e+08	1.2294e+08	2.11155	1.0783	2.22397e+08	1.05324e+08	1.5833	HMDB0011664	Organoheterocyclic compounds	Indoles and derivatives
NEG6758	---	3-Hydroxytetradecanedioic acid	0.0147344	UP	2.45358e+08	2.30849e+08	2.62578e+08	1.69687e+08	2.42973e+08	4.24616e+08	2.00387e+08	2.17234e+08	1.60695e+08	1.27045e+08	1.68511e+08	2.16308e+08	8.70577e+07	2.03682e+08	1.10606e+08	1.93214e+08	1.31016e+08	1.38712e+08	6.65052e+07	1.52832e+08	1.55363	0.635646	2.28142e+08	1.46844e+08	1.65421	HMDB0000394	Lipids and lipid-like molecules	Fatty Acyls
NEG408	C00065	Serine	0.0172747	UP	1.47487e+07	1.07807e+07	2.22471e+07	1.05717e+07	2.61486e+07	1.85941e+07	3.30614e+07	3.70083e+07	3.99314e+07	2.42987e+07	2.99311e+06	8.84693e+06	1.3402e+07	1.78224e+07	1.15099e+07	1.27532e+07	1.08513e+07	1.82101e+07	1.72023e+07	2.42959e+07	1.72163	0.783776	2.37391e+07	1.37887e+07	1.6537	HMDB0000187	Organic acids and derivatives	Carboxylic acids and derivatives
POS4635	C00864	Pantothenic acid	0.0216917	UP	1.28244e+09	1.05543e+09	1.46661e+09	1.47054e+09	1.00311e+09	7.61683e+08	8.94943e+08	1.81682e+09	1.17754e+09	1.18318e+09	8.08237e+08	8.03675e+08	1.20278e+09	1.12079e+09	6.29491e+08	8.43755e+08	7.23188e+08	740570874	1.29206e+09	9.03461e+08	1.33572	0.417618	1.21123e+09	9.068e+08	1.62783	HMDB0000210	Organic oxygen compounds	Organooxygen compounds
POS8267	C08149	Levonorgestrel	0.0228324	DOWN	1.66599e+07	2.74743e+07	2.04854e+08	2.35519e+07	6.90819e+07	4.45912e+07	3.20541e+07	5.21936e+07	3.15932e+07	3.31995e+07	6.57975e+08	5.45385e+07	100728435	813889708	2.82267e+08	1.14327e+08	3.06542e+08	5.60631e+07	2.12573e+08	7.2136e+07	0.200391	-2.31911	5.35253e+07	2.67104e+08	1.57921	HMDB0014511	Lipids and lipid-like molecules	Steroids and steroid derivatives
NEG4556	---	7-Epi-12-hydroxyjasmonic acid	0.0185552	UP	6.65547e+07	5.33037e+07	5.40518e+07	4.66621e+07	6.59949e+07	4.72742e+07	7.85599e+07	9.44752e+07	4.05885e+07	4.46948e+07	2.4107e+07	4.81566e+07	2.89319e+07	2.86623e+07	8.88915e+06	6.20869e+07	6.03487e+07	2.47879e+07	6.81976e+07	1.76321e+07	1.59268	0.671459	5.9216e+07	3.718e+07	1.6226	HMDB0303749	Lipids and lipid-like molecules	Fatty Acyls
POS10106	---	Succinoadenosine	0.0145048	UP	3.33634e+08	6.87532e+08	5.88171e+08	7.15567e+08	6.67185e+08	8.91456e+08	7.20073e+08	5.63884e+08	4.95654e+08	7.20796e+08	2.93575e+08	3.41202e+08	4.10306e+08	2.18024e+08	3.15085e+08	5.34916e+08	4.86383e+08	5.82391e+08	7.20082e+08	5.95132e+08	1.41957	0.505456	6.38395e+08	4.4971e+08	1.65671	HMDB0000912	Nucleosides, nucleotides, and analogues	Purine nucleosides
POS526	C00114	Choline	0.0226982	UP	2.84492e+09	1.27906e+09	1.21157e+09	8.31527e+08	9.48174e+08	7.37419e+08	1.02705e+09	2.03197e+09	1.93841e+09	9.96686e+08	6.95819e+08	1.39746e+09	8.3276e+08	1.18753e+09	7.51206e+08	7.2704e+08	6.90725e+08	9.56405e+08	3.21357e+08	3.75626e+08	1.74482	0.80308	1.38468e+09	7.93593e+08	1.56479	HMDB0000097	Organic nitrogen compounds	Organonitrogen compounds
POS1536	C05828	Methylimidazoleacetic acid	0.0116245	DOWN	7.19543e+08	1.22878e+09	7.24303e+08	7.69779e+08	7.59571e+08	7.3723e+08	4.79531e+08	7.45041e+08	1.61847e+09	1.15149e+09	2.56065e+09	3.98957e+09	7.82486e+08	9.26471e+08	1.1721e+09	1.1021e+09	1.50556e+09	1.38058e+09	2.33034e+09	3.01297e+09	0.47614	-1.07054	8.93373e+08	1.87628e+09	1.72866	HMDB0002820	Organoheterocyclic compounds	Azoles
POS1257	---	1,2-Dihydroquinoline	0.0185102	UP	1.93043e+08	1.71243e+08	2.08901e+08	1.84469e+08	2.63336e+08	2.37874e+08	3.05009e+08	2.52514e+08	2.01765e+08	2.20602e+08	1.64404e+08	2.28936e+08	1.33944e+08	1.34921e+08	1.45785e+08	2.15821e+08	1.68451e+08	2.2752e+08	1.54705e+08	2.06688e+08	1.2569	0.329868	2.23876e+08	1.78118e+08	1.68016	HMDB0244077	Organoheterocyclic compounds	Quinolines and derivatives
POS5085	---	Aspartyl-proline	0.0190842	UP	3.69501e+07	8.55553e+07	1.23362e+08	1.12617e+08	1.23593e+08	1.81501e+08	1.3166e+08	2.00686e+08	2.53569e+08	2.0632e+08	3.79976e+07	4.67386e+07	7.45109e+07	9.80943e+07	8.46265e+07	1.02163e+08	9.1249e+07	9.72874e+07	1.11237e+08	1.36194e+08	1.65415	0.726086	1.45581e+08	8.80099e+07	1.60415	HMDB0002335	Organic acids and derivatives	Carboxylic acids and derivatives
POS805	---	N-(3-Methylbutyl)acetamide	0.0252153	UP	1.40712e+09	2.23162e+09	1.91654e+09	2.24551e+09	2.49829e+09	2.38721e+09	1.16219e+09	3.31297e+09	3.09805e+09	2.04804e+09	8.0456e+08	1.66943e+09	1.65446e+09	1.15438e+09	1.28728e+09	1.44699e+09	1.92683e+09	1.16952e+09	1470756015	2.9269e+09	1.43817	0.52423	2.23076e+09	1.55111e+09	1.53712	HMDB0031651	Organic acids and derivatives	Carboxylic acids and derivatives
NEG3735	---	5-(3',4'-Dihydroxyphenyl)-gamma-valerolactone	0.0283787	DOWN	3.75646e+06	2.1873e+06	6.46897e+06	1.29158e+06	770840	3.31607e+06	1.32481e+06	1.05409e+06	2.23791e+06	374171	2.54997e+06	1.88742e+06	6.99123e+06	10911805	7.50413e+06	4.38652e+06	8.33069e+06	7.5385e+06	735682	1.52419e+06	0.435106	-1.20056	2.27822e+06	5.23601e+06	1.51331	HMDB0029185	Benzenoids	Phenols
POS13095	C00550	SM(d18:0/18:1)	0.0180261	DOWN	1.216e+07	1.64974e+07	2.25652e+07	2.06285e+07	9.31091e+06	1.07808e+07	7.17682e+06	4.33862e+06	1.11141e+07	7.51289e+06	2.2579e+08	1.51094e+08	9.87555e+07	1.28123e+08	3.14079e+07	1.52544e+07	2.46078e+07	2.7975e+07	1.37651e+07	1.62721e+07	0.166545	-2.58601	1.22085e+07	7.33045e+07	1.61841	HMDB0012088	Lipids and lipid-like molecules	Sphingolipids
NEG5807	---	N-lactoyl-Tyrosine	0.0176116	UP	7.10132e+07	5.80019e+07	2.45816e+07	1.55028e+07	6.55343e+07	7.74079e+07	1.26415e+08	5.87624e+07	5.17651e+07	6.73001e+07	4.96398e+07	5.0094e+07	2.00208e+07	1.70653e+07	1.10086e+07	4.33796e+07	3.35732e+07	4.43977e+07	26001637	4.44979e+07	1.81432	0.859427	6.16285e+07	3.39679e+07	1.66693	HMDB0062177	Organic acids and derivatives	Carboxylic acids and derivatives
POS339	---	3-Pyridinol	0.0235312	UP	1.11366e+08	7.53126e+07	6.22185e+07	1.01942e+08	6.82185e+07	4.51804e+07	9.34596e+07	7.58701e+07	1.42737e+08	5.74151e+07	7.10677e+07	3.85192e+07	4.97163e+07	4.34311e+07	46912780	5.56284e+07	9.63076e+07	6.40609e+07	5.41886e+07	5.03134e+07	1.46229	0.548231	8.3372e+07	5.70146e+07	1.55079	---	Organoheterocyclic compounds	Pyridines and derivatives
NEG1690	---	6-Butyltetrahydro-2H-pyran-2-one	0.017439	UP	3.49631e+08	1.50048e+08	1.81385e+08	1.86105e+08	3.04596e+08	3.15302e+08	2.79378e+08	3.04112e+08	1.25657e+08	6.96313e+07	1.05494e+08	6.04732e+07	1.3974e+08	2.04868e+08	1.00589e+08	2.38061e+08	1.87634e+08	1.56431e+08	5.31277e+07	6.13081e+07	1.73266	0.792988	2.26584e+08	1.30773e+08	1.6207	HMDB0031514	Organoheterocyclic compounds	Lactones
POS2015	C05135	N-Acetylhistamine	0.0225595	DOWN	9.56154e+06	1.52448e+07	3.32622e+07	2.61251e+07	1.6847e+07	1.57134e+07	4.28681e+06	2.11295e+07	1.54721e+07	1.25536e+07	1.16791e+07	3.97942e+06	4.79974e+07	3.39881e+07	2.69577e+07	3.60667e+07	3.38446e+07	5.48095e+07	8.89416e+07	2.96052e+07	0.462653	-1.112	1.70196e+07	3.67869e+07	1.56867	HMDB0013253	Organic acids and derivatives	Carboxylic acids and derivatives
POS11439	---	LPE(16:0)	0.024496	DOWN	6.59967e+06	1.12524e+07	6.37078e+06	7.83221e+06	9.84452e+06	1.18845e+07	5.72921e+06	4.42089e+06	5.93956e+06	3.31288e+06	3.61149e+06	1.27134e+07	6.41619e+06	1.71109e+07	1.44491e+07	4.08236e+07	2.02091e+07	2.24167e+07	1.55293e+07	6.02953e+06	0.459399	-1.12218	7.31866e+06	1.59309e+07	1.62915	HMDB0011503	Lipids and lipid-like molecules	Glycerophospholipids
POS906	---	Isoindoline	0.026688	UP	1.03042e+10	7116058627	8.84357e+09	6.70739e+09	1.13373e+10	9.78578e+09	1.72295e+10	1.32421e+10	8.82278e+09	1.03926e+10	7.37103e+09	8.89615e+09	7.73848e+09	5.1499e+09	5.56079e+09	8.93867e+09	6.3384e+09	8.13224e+09	9.85407e+09	9.28557e+09	1.34318	0.425653	1.03781e+10	7.72653e+09	1.59628	HMDB0253648	Organoheterocyclic compounds	Isoindoles and derivatives
POS2172	C19463	1,5-Naphthalenediamine	0.0229381	UP	2.70562e+08	2.19789e+08	3.0283e+08	2.75897e+08	4.09034e+08	3.47061e+08	4.51182e+08	3.91429e+08	2.68798e+08	3.20718e+08	2.16343e+08	3.10527e+08	2.15164e+08	1.91453e+08	2.17485e+08	2.88163e+08	2.49901e+08	3.14612e+08	2.3185e+08	3.27822e+08	1.27073	0.345661	3.2573e+08	2.56332e+08	1.62647	HMDB0244231	Benzenoids	Naphthalenes
POS1923	---	8-Oxo-7,8-dihydrodeoxyguanine	0.032657	DOWN	3.88778e+06	1.62726e+07	5.45422e+06	4.63505e+06	6.25633e+07	4.7237e+06	6.62861e+06	9.44883e+06	5.8799e+06	1.2267e+07	3.01814e+07	3.21091e+07	6.08896e+07	2.11035e+09	1.38468e+09	628596730	5.46511e+08	2.74791e+08	1.01566e+08	8.3368e+07	0.0250828	-5.31716	1.31761e+07	5.25304e+08	1.47844	HMDB0247457	Organoheterocyclic compounds	Imidazopyrimidines
NEG119	---	1-Hydroxy-2-butanone	0.0270568	UP	2.60109e+08	3.28826e+08	3.81935e+08	3.38462e+08	6.50555e+08	5.79904e+08	6.1417e+08	1.07764e+09	6.52758e+08	7.76108e+08	2.43978e+08	2.51408e+08	3.45482e+08	9.23552e+07	2.20252e+08	4.65531e+08	3.05541e+08	4.72272e+08	5.04279e+08	5.51728e+08	1.63937	0.713145	5.66047e+08	3.45283e+08	1.57307	HMDB0031507	Organic oxygen compounds	Organooxygen compounds
POS10723	C05466	Chenodeoxyglycocholic acid	0.032709	DOWN	1.24433e+07	9.29463e+06	1.71512e+07	1.78457e+07	3.99381e+07	4.58296e+07	3.1325e+07	5.87635e+07	4.22854e+07	6.60846e+07	1.15521e+07	5.17615e+06	7.7395e+07	6.58432e+07	5.72458e+07	1.32977e+08	1.04166e+08	1.01265e+08	5.68249e+07	5.38739e+07	0.511709	-0.966605	3.40961e+07	6.66319e+07	1.5941	HMDB0006898	Lipids and lipid-like molecules	Steroids and steroid derivatives
POS6824	---	Lauryldiethanolamine	0.0313773	UP	1.53352e+07	3.98248e+07	2.04847e+07	5.81178e+07	4.2173e+07	2.64539e+07	8.09546e+07	1.82646e+07	1.61344e+08	3.76082e+07	3.09168e+06	4.39797e+06	8.07889e+06	8.79565e+06	7.26825e+06	2.84955e+07	1.14144e+07	26440910	2.35465e+07	4.12584e+07	3.07492	1.62055	5.00561e+07	1.62788e+07	1.49873	---	Organic nitrogen compounds	Organonitrogen compounds
NEG1725	---	Tiglylglycine	0.0254687	UP	1.2706e+08	4.21318e+08	4.47464e+08	3.90744e+08	3.4061e+08	4.85136e+08	3.45166e+08	2.99781e+08	1.88015e+08	2.01975e+08	1.67495e+08	1.49912e+08	5.52328e+07	2.88533e+08	3.61639e+08	2.57918e+08	1.04774e+08	197042179	1.57906e+08	3.17088e+08	1.57823	0.658307	3.24727e+08	2.05754e+08	1.57013	HMDB0000959	Organic acids and derivatives	Carboxylic acids and derivatives
POS303	C14447	2-Methylpyridine	0.0220772	UP	1.39507e+08	1.18121e+08	1.02689e+08	8.87798e+07	2.30685e+08	1.98659e+08	2.42276e+08	1.5453e+08	1.59641e+08	1.57455e+08	4.6191e+07	1.03224e+08	8.78421e+07	7.54814e+07	5.58018e+07	1.66421e+08	1.19538e+08	1.52916e+08	1.40942e+08	1.24155e+08	1.48469	0.570159	1.59234e+08	1.07251e+08	1.67183	HMDB0061888	Organoheterocyclic compounds	Pyridines and derivatives
POS9803	C08491	Jasmonic acid	0.0374493	DOWN	3.94245e+07	2.45607e+07	3.89291e+07	1.57404e+07	2.24871e+07	2.1617e+07	1.85252e+07	5.55327e+06	6.99871e+06	4634381	1.54695e+08	4.07116e+07	5.26247e+07	8.68709e+07	2.30852e+07	2.79566e+07	1.29804e+08	3.75373e+07	8.2994e+06	8.03202e+06	0.348428	-1.52107	1.9847e+07	5.69617e+07	1.4441	HMDB0032797	Lipids and lipid-like molecules	Fatty Acyls
POS4382	C02678	Dodecanedioic acid	0.0236429	UP	1.67578e+08	1.17801e+08	1.04024e+08	8.75687e+07	1.04457e+08	1.25913e+08	2.12391e+08	1.17446e+08	1.05713e+08	8.2915e+07	1.25291e+08	1.00095e+08	4.91898e+07	1.32173e+08	4.94594e+07	1.0634e+08	1.0214e+08	6.17773e+07	41318555	4.36805e+07	1.51061	0.595129	1.22581e+08	8.11466e+07	1.54992	HMDB0000623	Lipids and lipid-like molecules	Fatty Acyls
POS7194	C08432	2-Hydroxyadenosine	0.0373784	DOWN	1.88422e+07	8.86246e+07	3.96801e+07	4.353e+07	5.45078e+07	2.31426e+07	1.65798e+07	1.4448e+07	1.65435e+07	2.39762e+07	2.14769e+07	2.82918e+07	3.63915e+07	1.65265e+09	1.04349e+09	5.93504e+08	5.11717e+08	2.21949e+08	7.30586e+07	5.36394e+07	0.0802317	-3.63968	3.39875e+07	4.23617e+08	1.44486	---	Nucleosides, nucleotides, and analogues	Purine nucleosides
POS2081	---	3-Ethyl-5-hydroxy-4,5-dimethyl-pyrrolin-2-one	0.0347133	DOWN	2.37036e+07	2.66337e+07	3.98453e+07	4.03861e+07	3.98834e+07	4.68986e+07	2.72889e+07	4.47128e+07	2.75558e+07	3.56228e+07	4.64945e+07	8.51823e+07	7.49133e+07	1.03466e+08	6.26119e+07	4.09641e+07	4.75791e+07	3.0738e+08	5.38958e+07	1.0268e+08	0.381046	-1.39196	3.52531e+07	9.25167e+07	1.49352	HMDB0253169	Organoheterocyclic compounds	Pyrrolines
POS335	C02502	2-Hydroxypyridine	0.0349042	UP	2.29302e+08	3.31862e+08	3.34905e+08	3.60439e+08	3.42151e+08	3.36104e+08	1.99042e+08	3.49463e+08	3.15478e+08	3.9419e+08	2.36298e+08	2.66898e+08	2.02598e+08	2.67116e+08	2.71734e+08	2.91226e+08	1.94935e+08	1.71543e+08	3.19591e+08	3.64558e+08	1.23446	0.303884	3.19294e+08	2.5865e+08	1.50554	HMDB0013751	Organoheterocyclic compounds	Pyridines and derivatives
POS13099	---	{[(2S,3R,4E)-3-hydroxy-2-octadecanamidooctadec-4-en-1-yl]oxy}[2-(trimethylazaniumyl)ethoxy]phosphinic acid	0.0210644	DOWN	4.397e+07	1.40661e+07	6.5476e+06	1.14844e+07	1.10252e+07	3.37758e+07	7.176e+06	8.84956e+06	1.05518e+07	1.06114e+07	7.74154e+07	9.90999e+07	5.74723e+07	2.84304e+07	3.11211e+07	2.43149e+07	1.46355e+07	2.48165e+07	2.38577e+07	2.27088e+07	0.391356	-1.35345	1.58058e+07	4.03873e+07	1.5763	---	Lipids and lipid-like molecules	Sphingolipids
POS389	---	4,5-Dimethyloxazole	0.0302912	UP	2.30978e+08	9.42662e+07	2.76802e+08	1.69869e+08	2.64344e+08	1.15721e+08	1.12491e+08	3.84824e+08	3.43202e+08	2.14512e+08	9.57097e+06	5.42176e+07	9.27169e+07	9.91794e+07	1.6702e+08	7.00249e+07	1.01706e+08	2.51095e+08	3.03826e+08	4.01064e+07	1.85547	0.891781	2.20701e+08	1.18946e+08	1.49296	HMDB0032970	Organoheterocyclic compounds	Azoles
POS1367	---	Benzo[d]isoxazol-3-ol	0.0238718	UP	2.00965e+08	7.84818e+07	2.88543e+08	2.10877e+08	4.44254e+08	3.98829e+08	3.57286e+08	4.11087e+08	1.68059e+08	2.16007e+08	5.00177e+07	1.28438e+08	2.5314e+08	2.47466e+08	1.46023e+08	2.94926e+08	1.052e+08	2.16798e+08	7.25641e+07	1.04793e+08	1.71326	0.776741	2.77439e+08	1.61937e+08	1.55514	HMDB0249006	Organoheterocyclic compounds	Benzisoxazoles
NEG825	C00245	Taurine	0.0387266	UP	2.58525e+08	4.57614e+08	1.47421e+08	1.41097e+08	1.96028e+08	1.02078e+08	4.51518e+08	7.09205e+08	7.26274e+08	6.55296e+08	3.01227e+08	4.64419e+08	8.77314e+07	9.29006e+07	1.32253e+08	1.06544e+08	1.07885e+08	3.82925e+07	1.83971e+08	3.34818e+08	2.07836	1.05545	3.84506e+08	1.85004e+08	1.4342	HMDB0000251	Organic acids and derivatives	Organic sulfonic acids and derivatives
POS7476	C00294	Inosine	0.0405738	DOWN	309361	1.71869e+07	9.5658e+06	2.80407e+06	5.05559e+06	4.47062e+06	3.97977e+06	3.80118e+06	2.36527e+06	2.56611e+06	1.26172e+07	4.68353e+06	1.34054e+07	5.77577e+07	3.02814e+07	1.96903e+07	2.0068e+07	1.13352e+07	746865	3.17048e+06	0.299873	-1.73758	5.21047e+06	1.73756e+07	1.43806	HMDB0000195	Nucleosides, nucleotides, and analogues	Purine nucleosides
POS3169	---	3,4,5,6-Tetrahydrohippuric acid	0.0333368	DOWN	1.91912e+07	1.92702e+07	5.46306e+07	2.07788e+07	2.63953e+07	1.38095e+07	2.29334e+07	1.92086e+07	2.56414e+07	2.40214e+07	1.64651e+07	2.7341e+07	3.95089e+07	1.356e+08	1.09099e+08	4.2641e+07	3.87174e+07	3.14498e+07	3.52229e+07	6.16368e+07	0.457298	-1.12879	2.4588e+07	5.37681e+07	1.4837	HMDB0061679	Organic acids and derivatives	Carboxylic acids and derivatives
POS3322	C02043	Indole-3-Lactic Acid	0.0277067	UP	8.67395e+09	7.33816e+09	8.57564e+09	7.53669e+09	1.1772e+10	1.10173e+10	1.33905e+10	1.01944e+10	7.0389e+09	9.02803e+09	6.94677e+09	9.44524e+09	5.27725e+09	5.39166e+09	6.03026e+09	8.62288e+09	6.59604e+09	1.00295e+10	6.90098e+09	8.86668e+09	1.27606	0.351699	9.45656e+09	7.41073e+09	1.58035	HMDB0000671	Organoheterocyclic compounds	Indoles and derivatives
POS12213	---	LPC(18:2)	0.0347546	DOWN	7.45043e+06	4.00468e+07	3.88624e+07	8.741e+07	1.07386e+08	1.02296e+08	3.54752e+07	2.0123e+07	2.80347e+07	1.79145e+07	768833	821521	288733	3.04659e+08	1.99561e+08	9.72312e+08	4.20989e+08	5.18379e+08	2.58361e+08	4.61801e+07	0.178156	-2.48878	4.84999e+07	2.72232e+08	1.55845	HMDB0010386	Lipids and lipid-like molecules	Glycerophospholipids
POS4044	C00078	Tryptophan	0.0299144	UP	6.28696e+09	5.49493e+09	7.09967e+09	6.00255e+09	7.52899e+09	8.16925e+09	1.01015e+10	8.6361e+09	6.36676e+09	8.41787e+09	4.85195e+09	7.16517e+09	4.67877e+09	4.796e+09	5.13544e+09	6.69898e+09	6.0064e+09	7.3364e+09	6.05608e+09	7.71081e+09	1.22617	0.294154	7.41046e+09	6.0436e+09	1.5656	HMDB0000929	Organoheterocyclic compounds	Indoles and derivatives
POS3643	C02710	Acetylleucine	0.0295739	DOWN	5.74341e+07	4.46233e+07	3.42443e+07	4.25586e+07	4.04613e+07	4.32444e+07	1.82882e+07	1.90434e+07	6.13736e+07	4.84985e+07	4.01599e+08	1.48992e+08	3.28162e+08	1.18672e+08	2.37839e+08	4.08486e+07	6.00264e+07	3.72186e+07	2.8062e+07	2.79643e+07	0.286676	-1.80251	4.0977e+07	1.42938e+08	1.51721	HMDB0011756	Organic acids and derivatives	Carboxylic acids and derivatives
POS13044	C00550	SM(d18:0/16:1)	0.0383411	UP	1.00657e+06	1.01859e+06	1.8264e+06	3.70352e+06	1.99332e+07	1.60118e+07	3.96968e+07	2.43895e+07	5.04204e+07	9.7622e+06	7.38923e+06	1.36997e+07	3.72232e+06	2.5748e+06	2.55632e+06	4.20707e+06	3.04976e+06	1.93039e+06	2.24285e+06	2.02668e+06	3.86573	1.95074	1.67769e+07	4.33991e+06	1.49487	HMDB0013464	Lipids and lipid-like molecules	Sphingolipids
POS9103	---	(E)-5-(1,2,4a,5-Tetramethyl-7-oxo-3,4,8,8a-tetrahydro-2H-naphthalen-1-yl)-3-methylpent-2-enoic acid	0.0233307	DOWN	5.00168e+06	9.94447e+06	1.30556e+07	2.40189e+07	14996936	1.56709e+07	1.7761e+07	1.426e+07	1.13376e+07	1.80074e+07	4.61905e+07	5.09016e+07	2.32683e+07	2.64508e+07	2.32038e+07	2.53476e+07	1.69846e+07	7.38473e+06	1.16685e+08	5.70954e+07	0.366073	-1.4498	1.44054e+07	3.93513e+07	1.56662	---	Lipids and lipid-like molecules	Prenol lipids
POS8266	---	Dydrogesterone	0.0413147	DOWN	3.16336e+07	2.16758e+07	1.37458e+08	7.92181e+07	7.8758e+07	4.70434e+07	3.36914e+07	6.50757e+07	3.5385e+07	4.55249e+07	4.84297e+08	3.84779e+07	6.48531e+07	5.82147e+08	2.01138e+08	1.12266e+08	1.90882e+08	5.32877e+07	1.31219e+08	5.81934e+07	0.300227	-1.73587	5.75463e+07	1.91676e+08	1.44428	HMDB0014522	Lipids and lipid-like molecules	Steroids and steroid derivatives
NEG1008	C00489	Glutaric acid	0.041406	UP	7.12016e+08	5.60766e+08	6.09122e+08	4.66193e+08	7.97266e+08	6.53516e+08	5.79651e+08	3.3952e+09	2.66101e+09	2.01679e+09	5.2164e+08	5.30976e+08	6.76691e+08	1.21412e+08	3.21259e+08	5.41525e+08	4.63774e+08	6.10513e+08	6.53476e+08	6.02633e+08	2.46863	1.30371	1.24515e+09	5.0439e+08	1.42469	HMDB0000661	Organic acids and derivatives	Carboxylic acids and derivatives
POS8765	C02140	Corticosterone	0.0347352	UP	5.89188e+07	5.69919e+07	6.64721e+07	6.54953e+07	1.27647e+08	6.16336e+07	4.93358e+07	8.92892e+07	7.10796e+07	4.75063e+07	1.52438e+07	3.84554e+07	5.90698e+07	2.72979e+07	3.4198e+07	8.0865e+07	5.73557e+07	5.72904e+07	5.94053e+07	4.56753e+07	1.46227	0.548212	6.9437e+07	4.74857e+07	1.48031	HMDB0001547	Lipids and lipid-like molecules	Steroids and steroid derivatives
POS1698	---	4,1-Benzoxazepine	0.0317593	UP	1.13558e+08	8.49599e+07	1.04267e+08	8.45858e+07	5.95982e+07	1.0628e+08	1.20476e+08	1.84441e+08	2.76365e+08	2.99184e+08	2.14023e+07	4.49135e+07	7.38308e+07	1.21582e+08	5.89128e+07	5.09841e+07	7.98963e+07	8.33661e+07	1.41739e+08	9.20103e+07	1.86527	0.899382	1.43371e+08	7.68638e+07	1.48354	HMDB0246595	Organoheterocyclic compounds	Benzoxazepines
NEG2130	C00366	Uric acid	0.0438135	UP	6.09934e+09	2.22871e+09	2.8166e+09	3.58894e+09	3.05252e+09	3.4008e+09	3.47307e+09	3.714e+09	4.18612e+09	1.36932e+09	2.47216e+09	2.91863e+09	1.18739e+09	6.96134e+08	2.41287e+09	3.25438e+09	3.94259e+09	2.26655e+09	1.78139e+09	2.25109e+09	1.46354	0.549458	3.39294e+09	2.31832e+09	1.421	HMDB0000289	Organoheterocyclic compounds	Imidazopyrimidines
NEG1754	---	5,6-Dimethyl-2,3-pyrazinedicarbonitrile	0.0326408	UP	9.82696e+07	3.81219e+07	3.28466e+07	5.20155e+07	7.87231e+07	5.93707e+07	4.86629e+07	4.44083e+07	9.07731e+07	5.06105e+07	6.29097e+07	3.35921e+07	4.44737e+07	5.63801e+07	3.93022e+07	3.30196e+07	5.00461e+07	2.56617e+07	2.99604e+07	3.13824e+07	1.45995	0.545918	5.93802e+07	4.06728e+07	1.48326	HMDB0246643	Organoheterocyclic compounds	Diazines
POS1538	---	Pi-Methylimidazoleacetic acid	0.0253717	DOWN	2.05939e+08	2.59421e+08	2.20792e+08	1.69569e+08	1.77183e+08	3.62377e+08	2.3388e+08	4.55716e+08	2.14971e+08	2.57739e+08	1.35798e+09	1.65838e+09	1.88186e+08	4.6274e+08	3.06993e+08	3.48682e+08	2.95177e+08	3.47509e+08	1.06436e+09	5.4577e+08	0.388941	-1.36238	2.55759e+08	6.57577e+08	1.5466	HMDB0004988	Organoheterocyclic compounds	Azoles
POS847	C00183	Valine	0.0310161	UP	4.99935e+07	7.70414e+07	3.11028e+07	3.62309e+07	5.97497e+07	4.86349e+07	1.57844e+08	3.57152e+07	6.52013e+07	3.29253e+07	2.42569e+07	4.55647e+07	3.49666e+07	2.47113e+07	1.82409e+07	3.75858e+07	3.84052e+07	4.42026e+07	2.64518e+07	5.7856e+06	1.98033	0.985742	5.94439e+07	3.00171e+07	1.50933	HMDB0000883	Organic acids and derivatives	Carboxylic acids and derivatives
POS1387	---	3-(2-Methylpropyl)pyridine	0.0418486	UP	4.84241e+08	7.94091e+08	4.16149e+08	6.238e+08	7.65847e+08	1.11794e+09	3.25397e+08	4.13374e+08	2.99318e+09	7.7777e+08	3.01164e+08	4.24371e+08	2.30819e+08	4.23618e+08	3.1248e+08	2.09506e+08	4.55078e+08	3.25406e+08	2.55111e+08	3.18912e+08	2.67523	1.41966	8.71178e+08	3.25646e+08	1.41239	HMDB0037287	Organoheterocyclic compounds	Pyridines and derivatives
POS1167	C01879	Pyroglutamic acid	0.0441043	DOWN	1.63685e+09	2.29611e+09	3.9565e+09	3.56352e+09	3.1776e+09	2.65025e+09	1.10351e+09	2.61352e+09	2.78177e+09	3.22978e+09	1.36183e+09	1.67002e+09	6.6993e+09	4.22538e+09	4.36453e+09	3.36009e+09	3.43e+09	6.31747e+09	5.82998e+09	3.48228e+09	0.662956	-0.593015	2.70094e+09	4.07409e+09	1.39909	HMDB0000267	Organic acids and derivatives	Carboxylic acids and derivatives
POS11980	C04102	LPC(16:0)	0.0431486	DOWN	3.37231e+07	1.70948e+08	1.61673e+08	2.49793e+08	3.03872e+08	3.17245e+08	1.43541e+08	7.48671e+07	1.17361e+08	6.61753e+07	1.31899e+07	1.07437e+07	1.05501e+07	7.91184e+08	4.76986e+08	2.43877e+09	1.18807e+09	1.33797e+09	6.4999e+08	130650299	0.232573	-2.10424	1.6392e+08	7.04811e+08	1.50709	HMDB0010382	Lipids and lipid-like molecules	Glycerophospholipids
POS1861	C00913	3-Methyladenine	0.0297793	UP	3.09856e+08	2.35042e+08	2.79595e+08	2.68093e+08	2.2068e+08	4.50535e+08	2.56222e+08	277803019	2.39259e+08	3.30433e+08	1.54463e+08	6.99931e+07	2.66827e+08	2.30752e+08	2.16387e+08	2.18782e+08	2.32562e+08	2.62895e+08	2.10953e+08	3.06602e+08	1.32131	0.401965	2.86752e+08	2.17021e+08	1.50247	HMDB0011600	Organoheterocyclic compounds	Imidazopyrimidines
POS11332	---	Naringenin-7-O-Glucuronide	0.0470751	UP	546097	209543	9.08821e+06	7.35563e+07	6.51071e+06	2.65197e+06	2.54297e+06	4.30229e+07	2.79618e+07	2.34823e+07	4.15574e+06	1.60964e+06	1.35861e+06	307692	89938.1	57192.3	294736	3375.61	6.42889e+06	1.20247e+07	7.19974	2.84795	1.89573e+07	2.63305e+06	1.422	HMDB0029209	Phenylpropanoids and polyketides	Flavonoids
POS3009	---	Maltoxazine	0.0423892	DOWN	2.98785e+07	2.44121e+07	3.35552e+07	2.86499e+06	4.27834e+07	3.28649e+07	3.61006e+07	3.23146e+07	5.05837e+07	1.34523e+08	1.86982e+08	5.05928e+07	6.32544e+08	2.53273e+08	3.90533e+08	1.31723e+08	7.08017e+07	4.55485e+07	2.54109e+07	2.11216e+07	0.232167	-2.10677	4.19881e+07	1.80853e+08	1.42306	HMDB0030372	Organoheterocyclic compounds	Pyrrolidines
POS5408	---	3,6,9,12-Tetraoxatetradecane-1,14-diol	0.0450384	DOWN	1.50949e+08	2.35504e+08	1.25246e+08	1.59852e+08	1.60114e+08	1.202e+08	5.29063e+07	1.28179e+08	2.20236e+08	9.27711e+07	9.75286e+07	1.37993e+08	1.26611e+08	2.26526e+08	4.31515e+08	4.16346e+08	4.61475e+08	2.63788e+08	1.28165e+08	1.80358e+08	0.585335	-0.772665	1.44596e+08	2.47031e+08	1.41885	HMDB0256256	Organic oxygen compounds	Organooxygen compounds
POS4489	---	1,2,3,4-Tetrahydro-beta-carboline-3-carboxylic acid	0.0354302	UP	1.09076e+08	9.85363e+07	302056159	4.99767e+08	6.29007e+08	836486986	4.00857e+08	2.70025e+08	3.53342e+08	2.61591e+08	2.36868e+08	1.39219e+08	1.21661e+08	1.94153e+08	9.70332e+07	3.65616e+08	1.61224e+08	2.162e+08	2.58465e+08	2.31839e+08	1.85966	0.895036	3.76074e+08	2.02228e+08	1.45933	HMDB0035665	Organoheterocyclic compounds	Indoles and derivatives
POS1863	---	2,3-Dihydro-6-methyl-1H-pyrrolizine-5-carboxaldehyde	0.0397362	DOWN	6.47259e+07	1.70362e+07	6.3897e+07	4.21839e+07	4.37553e+07	3.49477e+07	3.80616e+07	4.56839e+07	7.50051e+07	1.2025e+08	2.31809e+08	9.45044e+07	5.16388e+08	1.76289e+08	3.02025e+08	1.50976e+08	5.90483e+07	5.03012e+07	2.75299e+07	3.29391e+07	0.332284	-1.58951	5.45546e+07	1.64181e+08	1.43786	HMDB0040047	Organoheterocyclic compounds	Pyrrolizines
NEG3496	---	1-Carboxyethylisoleucine	0.0460093	UP	4.23342e+08	8.10951e+08	2.34201e+08	1.77924e+08	2.86137e+08	2.95016e+08	4.59725e+08	4.03792e+08	3.38901e+08	5.50489e+08	4.98574e+08	4.75775e+08	1.17319e+08	1.67409e+08	1.28149e+08	1.94313e+08	1.4981e+08	1.15131e+08	2.34547e+08	3.2144e+08	1.65683	0.728424	3.98048e+08	2.40247e+08	1.40122	HMDB0242158	Organic acids and derivatives	Carboxylic acids and derivatives
POS838	C00463	Indole	0.0389636	UP	5.14814e+08	4.71662e+08	5.83491e+08	4.79955e+08	7.12607e+08	5.52063e+08	7.06121e+08	5.71361e+08	4.47689e+08	5.00047e+08	3.83745e+08	4.97013e+08	2.68884e+08	2.64613e+08	4.10722e+08	5.82908e+08	4.61025e+08	6.56744e+08	4.24394e+08	4.9863e+08	1.24527	0.31646	5.53981e+08	4.44868e+08	1.49741	HMDB0000738	Organoheterocyclic compounds	Indoles and derivatives
NEG5448	---	3-(3-Sulfooxyphenyl)propanoic acid	0.036914	DOWN	5.02801e+07	9.7394e+07	5.85092e+08	3.65761e+08	1.02087e+08	4.49726e+07	5.68963e+07	1.19089e+08	7.08077e+07	2.26767e+08	1.68424e+08	1.86159e+08	9.46164e+07	3.64677e+08	7.97679e+08	2.07522e+08	2.99905e+08	411003686	9.68154e+08	1.14598e+09	0.370177	-1.43371	1.71915e+08	4.64412e+08	1.44405	HMDB0094710	Organic acids and derivatives	Organic sulfuric acids and derivatives
POS9323	C05475	Dihydrocorticosterone	0.0385873	UP	2.707e+07	3.43801e+07	5.06129e+07	4.23203e+07	8.31651e+07	5.9953e+07	4.80241e+07	5.32853e+07	4.44434e+07	4.40264e+07	7.86676e+06	1.92636e+07	4.93291e+07	2.83107e+07	2.16057e+07	6.88864e+07	3.71695e+07	3.54368e+07	3.44853e+07	2.28733e+07	1.49828	0.583305	4.87281e+07	3.25227e+07	1.45014	HMDB0251299	Lipids and lipid-like molecules	Steroids and steroid derivatives
POS3162	C00588	Phosphocholine	0.0336622	DOWN	6.21897e+06	3.38299e+06	595904	751955	8.5261e+06	606429	443943	562544	414748	2.56051e+06	3.59919e+07	4.90268e+07	3.46116e+06	1.85403e+06	9.92652e+06	2.76422e+06	4.08819e+06	2.06868e+06	2.33916e+07	1.29794e+07	0.165329	-2.59658	2.40641e+06	1.45552e+07	1.47213	HMDB0001565	Organic nitrogen compounds	Organonitrogen compounds
POS8370	---	Oct-5-enedioylcarnitine	0.0481805	DOWN	1.49354e+08	1.86176e+08	2.70232e+08	3.06182e+08	2.62336e+08	2.17109e+08	2.80027e+08	3.03609e+08	2.30835e+08	2.26285e+08	2.44746e+08	2.10118e+08	2.72392e+08	3.02355e+08	3.49354e+08	2.83863e+08	2.62234e+08	3.21891e+08	3.23946e+08	3.00668e+08	0.846975	-0.239608	2.43215e+08	2.87157e+08	1.3916	HMDB0241709	Lipids and lipid-like molecules	Fatty Acyls
POS6564	C00212	Adenosine	0.0435628	DOWN	6.59313e+08	6.24414e+08	6.40264e+08	6.64098e+08	4.30837e+08	1.10752e+09	8.38434e+08	8.84901e+08	4.9432e+08	6.25802e+08	6.67796e+08	8.03083e+08	4.66827e+08	1.72984e+09	2.27614e+09	3.09313e+09	1.30029e+09	6.93282e+08	6.25535e+08	1.31103e+09	0.537513	-0.895628	6.96991e+08	1.2967e+09	1.44672	HMDB0000050	Nucleosides, nucleotides, and analogues	Purine nucleosides
NEG421	C00258	Glycerate	0.0423683	UP	7.52432e+07	1.58187e+08	1.14947e+08	1.28015e+08	9.42158e+07	1.12451e+08	1.04218e+08	9.59229e+07	1.02031e+08	7.53963e+07	5.15611e+07	7.23165e+07	1.15038e+08	7.65672e+07	9.55427e+07	7.74428e+07	1.02689e+08	1.04884e+08	7.86209e+07	6.86423e+07	1.2577	0.330789	1.06063e+08	8.43306e+07	1.45585	HMDB0000139	Organic oxygen compounds	Organooxygen compounds
POS1118	C04092	1-Piperideine-2-carboxylic acid	0.0464919	UP	2.16864e+08	1.82577e+08	1.30983e+08	1.75856e+08	3.07259e+08	1.99766e+08	1.76286e+08	2.02764e+08	3.42205e+08	3.0653e+08	2.55246e+08	8.27117e+07	1.87566e+08	1.57477e+08	9.76434e+07	1.05869e+08	1.70598e+08	1.39392e+08	1.86138e+08	2.43353e+08	1.37829	0.462878	2.24109e+08	1.62599e+08	1.38604	HMDB0001084	Organoheterocyclic compounds	Pyridines and derivatives
POS898	C03678	4-Amino-3-hydroxybutanoate	0.0484978	UP	5.98825e+07	9.79162e+07	2.55214e+08	3.12023e+08	2.0776e+08	2.28654e+08	2.66245e+08	1.92942e+08	2.73213e+08	2.66686e+08	5.40385e+07	9.47535e+07	9.46883e+07	1.1441e+08	1.76455e+08	1.30641e+08	2.01908e+08	1.07715e+08	2.66602e+08	2.18994e+08	1.47961	0.565218	2.16054e+08	1.4602e+08	1.37565	HMDB0061877	Organic acids and derivatives	Carboxylic acids and derivatives
NEG1475	C00522	Pantoic acid	0.0413253	UP	1.10409e+08	8.99283e+07	1.74795e+08	1.58351e+08	3.75116e+08	1.49373e+08	1.83334e+08	2.91677e+08	1.4825e+08	2.21627e+08	1.72924e+08	8.56613e+07	8.45858e+07	5.23069e+07	2.03746e+08	4.63395e+07	1.75414e+08	9.83477e+07	1.59479e+08	1.1387e+08	1.59546	0.673969	1.90286e+08	1.19267e+08	1.41801	HMDB0240389	Lipids and lipid-like molecules	Fatty Acyls
NEG3455	---	3-Methylazelaic acid	0.0402085	UP	1.25866e+09	6.83487e+08	8.63774e+08	7.91652e+08	6.16818e+08	1.19365e+09	2.28064e+09	9.92371e+08	5.35974e+08	5.73592e+08	2.40325e+08	3.30158e+08	4.3571e+08	1.40841e+09	5.22164e+08	5.42911e+08	5.59382e+08	6.54641e+08	4.12259e+08	3.88814e+08	1.7818	0.833339	9.79061e+08	5.49477e+08	1.42259	HMDB0059754	Lipids and lipid-like molecules	Fatty Acyls
POS5325	---	Oxyglutinosone	0.0487526	UP	9.84546e+07	2.36823e+08	1.65981e+08	2.95478e+08	1.58444e+08	2.75051e+08	2.82827e+08	2.97634e+08	3.15901e+08	4.21773e+08	1.43247e+08	2.60153e+08	1.34104e+08	1.55798e+08	2.17657e+08	2.35386e+08	2.16727e+08	1.46483e+08	2.07228e+08	1.32621e+08	1.37794	0.462513	2.54837e+08	1.8494e+08	1.37364	HMDB0302978	Organic oxygen compounds	Organooxygen compounds
NEG7162	---	Xanthosine (Not validated)	0.0482756	UP	2.17464e+08	7.57656e+08	1.66344e+08	1.73799e+08	3.59714e+08	2.8827e+08	2.5099e+08	3.16438e+08	1.98546e+08	2.63162e+08	1.04525e+08	1.29738e+08	1.32175e+08	6.87405e+07	1.12416e+08	2.80915e+08	2.21983e+08	2.40363e+08	2.28226e+08	2.20382e+08	1.72029	0.782653	2.99238e+08	1.73946e+08	1.37524	---	---	---
POS9793	---	3, 5-Tetradecadiencarnitine	0.0462023	DOWN	3.10601e+07	5.23631e+07	4.94068e+07	5.60448e+07	3.38184e+07	6.33407e+07	4.54036e+07	5.95085e+07	4.25681e+07	8.36191e+07	3.44642e+07	7.18565e+07	7.63735e+07	6.39939e+07	1.20825e+08	5.81716e+07	3.45444e+07	7.27812e+07	1.12754e+08	9.30558e+07	0.699945	-0.514687	5.17133e+07	7.3882e+07	1.3869	HMDB0013331	Lipids and lipid-like molecules	Fatty Acyls
POS3041	C01197	Caffeic acid	0.0480899	UP	2.24625e+08	1.36731e+08	3.20009e+08	2.80155e+08	1.09764e+08	3.64149e+08	9.40354e+07	3.25875e+08	1.68175e+08	1.71315e+08	8.16095e+07	5.17206e+07	1.03858e+08	1.63489e+08	1.36924e+08	1.56979e+08	1.98855e+08	3.04336e+08	7.42818e+07	100622956	1.59895	0.677122	2.19483e+08	1.37267e+08	1.39381	HMDB0001964	Phenylpropanoids and polyketides	Cinnamic acids and derivatives
POS9208	---	Lauroylcarnitine	0.0491788	DOWN	1.80215e+07	1.69485e+07	2.24977e+07	2.02777e+07	1.99225e+07	2.25067e+07	1.06201e+07	3.52524e+07	1.7915e+07	4.08749e+07	2.47969e+07	2.01726e+07	7.36769e+07	2.4866e+07	3.69547e+07	3.16258e+07	1.42342e+07	3.54581e+07	5.15121e+07	4.12624e+07	0.63413	-0.65715	2.24837e+07	3.5456e+07	1.37124	HMDB0002250	Lipids and lipid-like molecules	Fatty Acyls
POS6199	---	Ribothymidine	0.0453846	DOWN	2.16524e+07	8.10386e+06	1.05321e+07	1.39004e+07	2.55674e+07	3.01173e+07	3.45892e+07	1.30242e+07	1.02398e+07	3.26653e+07	2.80308e+08	1.49987e+08	9.97366e+06	1.02777e+07	1.67418e+07	4.7409e+07	2.96337e+07	2.74898e+07	1.9232e+08	7.17491e+07	0.239735	-2.06049	2.00392e+07	8.3589e+07	1.40254	HMDB0000884	Nucleosides, nucleotides, and analogues	Pyrimidine nucleosides
NEG2404	C00072	Ascorbic acid	0.0439407	DOWN	1.51173e+07	6.01124e+07	3.14306e+07	3.94069e+07	4.46391e+07	5.92299e+07	3.66498e+07	1.64889e+08	3.12387e+07	3.55674e+07	8.00077e+06	1.84396e+09	2.07004e+09	5.87089e+08	1.96947e+08	4.85322e+07	3.35877e+07	2.40791e+07	8.7168e+07	2.70312e+09	0.0681722	-3.87467	5.18281e+07	7.60253e+08	1.41552	HMDB0000044	Organoheterocyclic compounds	Dihydrofurans
POS9125	---	1-Pentyl-3-(1-naphthoyl) indole	0.0496815	DOWN	3.55493e+07	5.66962e+07	5.70537e+07	6.07493e+07	4.60062e+07	4.14056e+07	4.56901e+07	5.48587e+07	5.06588e+07	3.80422e+07	4.72214e+07	4.1055e+07	4.86359e+07	5.4976e+07	6.5318e+07	7.48836e+07	5.80138e+07	5.97609e+07	6.33975e+07	6.08342e+07	0.847785	-0.23823	4.8671e+07	5.74096e+07	1.38901	HMDB0243989	Organoheterocyclic compounds	Indoles and derivatives
NEG5973	C00140	GlcNAc	0.0488102	UP	2.28709e+08	4.24539e+08	3.32632e+08	3.078e+08	5.67158e+08	5.88952e+08	4.26699e+08	4.88124e+08	3.10177e+08	2.09597e+08	1.45307e+08	8.07423e+07	1.99834e+08	2.03353e+08	2.44221e+08	4.71109e+08	3.72536e+08	5.38466e+08	1.22351e+08	1.35115e+08	1.5457	0.628256	3.88439e+08	2.51304e+08	1.40421	HMDB0000215	Organic oxygen compounds	Organooxygen compounds

## Sheet: A2 VS B
Differential metabolites for A2 group vs B group
Alignment ID	KEGGID	Metabolite name	P.value	Significant	A2-1	A2-2	A2-3	A2-4	A2-5	A2-6	A2-7	A2-8	A2-9	A2-10	B-1	B-2	B-3	B-4	B-5	B-6	B-7	B-8	B-9	B-10	FC	Log2FC	Mean.After2	Mean.Before	PLSDA.VIP	HMDBID	Superclass	Class
POS13386	---	PC(16:0/18:0)	1.40047e-08	DOWN	4.31031e+07	3.86151e+07	2.40083e+07	2.93666e+07	1.7442e+07	2.83903e+07	3.24773e+07	2.96082e+07	2.33982e+07	2.85101e+07	8.56399e+07	8.54328e+07	7.62311e+07	9.20176e+07	7.87368e+07	7.65038e+07	9.13987e+07	8.69906e+07	4.53794e+07	6.56679e+07	0.376173	-1.41053	2.94919e+07	7.83999e+07	3.24092	HMDB0007970	Lipids and lipid-like molecules	Glycerophospholipids
POS13857	---	PC(18:0/20:4)	1.36395e-07	DOWN	2.81542e+07	2.19501e+07	1.89403e+07	1.73489e+07	1.5337e+07	1.31179e+07	1.27737e+07	1.99246e+07	1.12138e+07	1.29845e+07	7.32939e+07	8.68813e+07	9.01184e+07	5.8094e+07	1.09912e+08	1.04805e+08	9.56945e+07	8.10261e+07	4.29304e+07	4.93222e+07	0.216828	-2.20537	1.71745e+07	7.92078e+07	3.15665	HMDB0008048	Lipids and lipid-like molecules	Glycerophospholipids
POS11786	---	LPE(18:1)	9.96963e-07	DOWN	5.68374e+06	4.07048e+06	4.43056e+06	1.45802e+06	3.11086e+06	2.26251e+06	2.78041e+06	4.279e+06	1.84023e+06	2.26288e+06	5.40173e+06	1.18308e+07	9.32765e+06	1.17385e+07	6.09217e+06	1.09294e+07	1.14698e+07	1.42042e+07	9.16212e+06	1.12855e+07	0.317213	-1.65648	3.21787e+06	1.01442e+07	3.06941	HMDB0011506	Lipids and lipid-like molecules	Glycerophospholipids
POS13231	---	PE(P-18:0/20:4)	1.97136e-06	DOWN	2.64371e+06	7.05324e+06	4.85204e+06	3.55781e+06	6.23876e+06	1.58571e+06	3.40814e+06	2.67303e+06	2.05272e+06	2.59225e+06	2.36095e+07	2.02288e+07	2.77004e+07	1.93368e+07	2.38999e+07	3.4751e+07	6.2408e+07	4.03143e+07	4.34666e+07	3.17983e+07	0.111926	-3.15938	3.66574e+06	3.27514e+07	3.02295	HMDB0005779	Lipids and lipid-like molecules	Glycerophospholipids
POS13120	---	PC(16:0/16:0)	2.34607e-06	DOWN	3.40737e+07	4.03476e+07	2.39346e+07	3.51247e+07	2.43674e+07	1.49005e+07	1.24404e+07	4.11048e+07	8.33251e+06	1.47979e+07	6.00877e+08	7.24347e+08	7.98422e+08	4.79479e+08	5.11736e+08	2.54769e+08	2.79167e+08	8.76088e+08	2.86063e+08	3.42551e+08	0.048399	-4.36888	2.49424e+07	5.1535e+08	2.99956	HMDB0000564	Lipids and lipid-like molecules	Glycerophospholipids
POS13328	---	PC(18:1/16:0)	1.10993e-05	DOWN	2.90649e+08	8.19401e+08	3.05315e+08	2.29247e+08	2.28427e+08	1.60304e+08	2.4395e+08	2.72903e+08	1.81184e+08	1.96291e+08	4.24217e+09	3.88425e+09	4.37822e+09	1.70174e+09	3.0467e+09	2.98591e+09	5.40944e+09	3.72732e+09	9.50129e+08	1.08726e+09	0.093199	-3.42354	2.92767e+08	3.14131e+09	2.88948	HMDB0008100	Lipids and lipid-like molecules	Glycerophospholipids
POS3566	---	5,6-Dihydroxy-2-methylaminotetralin	2.61074e-05	UP	1.00987e+08	1.08912e+08	1.00859e+08	9.54771e+07	1.08069e+08	8.71791e+07	9.89462e+07	1.43316e+08	9.36006e+07	1.23044e+08	41860358	5.52365e+07	7.15809e+07	5.8889e+07	5.96583e+07	6.17388e+07	8.77137e+07	9.41733e+07	6.21412e+07	6.96974e+07	1.60013	0.678191	1.06039e+08	6.62689e+07	2.81867	HMDB0246248	Benzenoids	Tetralins
POS11815	---	22-Hydoxy-2-hopen-1-one	3.22731e-05	UP	6.40996e+07	7.07916e+07	6.77995e+07	7.39828e+07	7.15861e+07	6.20426e+07	9.57457e+07	1.29153e+08	8.00662e+07	1.23185e+08	1.40169e+07	1.76654e+07	3.03244e+07	3.16976e+07	3.20362e+07	3.45612e+07	5.30584e+07	4.04373e+07	4.94699e+07	5.24853e+07	2.35684	1.23685	8.38452e+07	3.55753e+07	2.79928	---	Lipids and lipid-like molecules	Prenol lipids
POS13329	---	PC(16:0/18:1)	3.12857e-05	DOWN	5.03681e+07	5.42066e+07	2.94746e+07	1.45291e+07	2.5413e+07	3.97706e+07	2.03161e+07	3.82985e+07	1.7811e+07	2.61615e+07	5.16177e+08	6.79857e+08	5.80925e+08	7.43802e+08	3.48241e+08	5.04824e+08	2.9095e+08	2.03721e+08	1.81868e+08	1.09271e+08	0.0760521	-3.71687	3.16349e+07	4.15964e+08	2.8007	HMDB0007972	Lipids and lipid-like molecules	Glycerophospholipids
POS2391	---	Dimethylamphetamine	0.00012113	UP	8.60288e+07	1.44929e+08	9.00035e+07	1.12994e+08	1.5447e+08	1.74079e+08	7.13728e+07	1.38709e+08	7.8872e+07	1.31802e+08	5.1915e+07	4.93461e+07	4.73373e+07	4.61793e+07	7.412e+07	5.85215e+07	8.75903e+07	6.91837e+07	6.52435e+07	3.87173e+07	2.01182	1.0085	1.18326e+08	5.88154e+07	2.66933	HMDB0041880	Benzenoids	Benzene and substituted derivatives
NEG502	---	3-Hydroxy-2H-pyran-2-one	0.00010635	UP	1.36308e+08	1.55117e+08	1.4251e+08	1.63121e+08	2.03911e+08	8.73087e+07	1.37087e+08	1.67655e+08	4.9677e+07	5.67404e+07	4.73845e+07	5.52065e+07	4.04413e+07	1.25354e+07	1.54111e+07	4.91757e+07	2.49008e+07	3.36976e+07	1.03604e+08	3.85184e+07	3.08746	1.62642	1.29944e+08	4.20875e+07	2.68109	HMDB0032994	Organoheterocyclic compounds	Pyrans
POS12230	C03916	LPC(18:1)	0.000115468	DOWN	5.15431e+06	5.25837e+06	4.47082e+06	3.11967e+06	4.82099e+06	2.51641e+06	5.4541e+06	5.22524e+06	4.19332e+06	4.9817e+06	1.90679e+07	2.17636e+07	1.38512e+07	8.00943e+06	6.87374e+06	8.04724e+06	1.78512e+07	1.41816e+07	1.09847e+07	8.17786e+06	0.350869	-1.51099	4.51949e+06	1.28808e+07	2.68221	HMDB0002815	Lipids and lipid-like molecules	Glycerophospholipids
POS495	---	Di-N-propylamine	0.000137917	UP	5.67035e+08	6.02005e+08	5.95942e+08	4.91766e+08	5.20594e+08	3.97558e+08	5.99709e+08	8.48957e+08	4.87343e+08	7.98029e+08	2.45909e+08	3.09277e+08	3.87536e+08	3.23708e+08	2.65889e+08	2.79491e+08	3.91021e+08	5.47224e+08	3.24208e+08	3.44552e+08	1.72836	0.789402	5.90894e+08	3.41882e+08	2.6552	HMDB0302261	Organic nitrogen compounds	Organonitrogen compounds
POS602	---	3-Ethylpyridine	0.000969899	UP	5.71381e+08	5.55482e+08	9.94145e+08	4.83765e+08	8.68146e+08	7.25773e+08	5.00278e+08	1.01179e+09	3.53832e+08	1.05366e+09	2.80468e+08	5.54776e+08	2.08507e+08	2.14573e+08	4.82882e+08	4.65496e+08	4.81209e+08	3.47411e+08	1.8277e+08	3.27164e+08	2.00783	1.00563	7.11825e+08	3.54526e+08	2.4042	HMDB0029734	Organoheterocyclic compounds	Pyridines and derivatives
POS6159	---	3-Methylcytidine	0.000888446	UP	1.00229e+08	7.15141e+07	3.8335e+07	3.99985e+07	2.51931e+07	4.20952e+07	3.53412e+07	7.76743e+07	2.0493e+07	2.4134e+07	1.80327e+07	7.67762e+06	1.29018e+07	1.11835e+07	1.14613e+07	1.47362e+07	1.7017e+07	1.7898e+07	1.11422e+07	1.6044e+07	3.43973	1.7823	4.75007e+07	1.38094e+07	2.41723	HMDB0240577	Nucleosides, nucleotides, and analogues	Pyrimidine nucleosides
POS4329	---	N-Acetyl-3-methylhistidine	0.00159587	UP	1.36275e+08	7.95022e+07	1.08698e+08	1.03343e+08	1.10768e+08	1.08479e+08	7.6269e+07	1.18968e+08	9.10866e+07	1.66748e+08	2.60811e+07	1.55334e+07	2.90375e+07	3.34472e+07	4.38698e+07	5.20169e+07	9.31908e+07	6.69421e+07	1.1274e+08	1.07005e+08	1.89723	0.923897	1.10014e+08	5.79864e+07	2.32884	HMDB0240341	Organic acids and derivatives	Carboxylic acids and derivatives
POS339	---	3-Pyridinol	0.00169516	UP	8.055e+07	7.85556e+07	8.76517e+07	7.51157e+07	9.14137e+07	7.88647e+07	6.22299e+07	6.74479e+07	8.8435e+07	1.09965e+08	7.10677e+07	3.85192e+07	4.97163e+07	4.34311e+07	46912780	5.56284e+07	9.63076e+07	6.40609e+07	5.41886e+07	5.03134e+07	1.43863	0.524696	8.20229e+07	5.70146e+07	2.3281	---	Organoheterocyclic compounds	Pyridines and derivatives
POS1366	---	Benzothiazole	0.00118928	UP	9.18616e+07	9.37574e+07	7.31465e+07	7.7284e+07	8.97866e+07	7.9297e+07	1.0835e+08	1.42685e+08	8.5884e+07	1.02631e+08	4.84381e+07	4.96194e+07	6.56869e+07	5.86887e+07	5.09528e+07	7.18334e+07	9.56074e+07	7.50412e+07	5.01058e+07	7.15073e+07	1.4819	0.567447	9.44683e+07	6.37481e+07	2.3734	HMDB0032930	Organoheterocyclic compounds	Benzothiazoles
POS3161	C00588	Phosphocholine	0.00178942	DOWN	4.22552e+07	2.40264e+07	1.61446e+07	1.45566e+07	5.77183e+07	1.81776e+07	2.9186e+07	2.88363e+07	1.83635e+07	2.3008e+07	5.16257e+07	9.85497e+07	4.85648e+07	9.13233e+07	3.80926e+07	4.88969e+07	9.2869e+07	5.36323e+07	2.17395e+07	6.08413e+07	0.449194	-1.15459	2.72272e+07	6.06135e+07	2.3132	HMDB0001565	Organic nitrogen compounds	Organonitrogen compounds
POS11439	---	LPE(16:0)	0.0017128	DOWN	2.00545e+06	2.84542e+06	1.89078e+06	2.75622e+06	4.00383e+06	4.44612e+06	3.49e+06	3.80427e+06	4.012e+06	4.75958e+06	3.61149e+06	1.27134e+07	6.41619e+06	1.71109e+07	1.44491e+07	4.08236e+07	2.02091e+07	2.24167e+07	1.55293e+07	6.02953e+06	0.213507	-2.22765	3.40137e+06	1.59309e+07	2.34133	HMDB0011503	Lipids and lipid-like molecules	Glycerophospholipids
POS2217	---	N-Acetylvaline	0.00356383	UP	4.26029e+08	2.79436e+08	2.71141e+08	2.70589e+08	4.02496e+08	2.85772e+08	3.73906e+08	3.47921e+08	3.60558e+08	3.98168e+08	1.8202e+08	1.13218e+08	3.20311e+08	1.79952e+08	2.5616e+08	3.41945e+08	2.60408e+08	2.29996e+08	3.2843e+08	1.63607e+08	1.43769	0.523751	3.41602e+08	2.37605e+08	2.19067	HMDB0011757	Organic acids and derivatives	Carboxylic acids and derivatives
POS4602	---	Curcumol	0.00271733	DOWN	2.10201e+07	1.64781e+07	1.77377e+07	1.35246e+07	8.41894e+06	2.71269e+07	6.57214e+06	1.96642e+07	4.32964e+07	3.01238e+07	2.33815e+07	5.94053e+07	3.39947e+07	5.05097e+07	2.98447e+07	2.52765e+07	3.49669e+07	7.14593e+07	3.4587e+07	5.37014e+07	0.48897	-1.03218	2.03963e+07	4.17127e+07	2.24329	HMDB0038122	Organooxygen compounds	Prenol lipids
POS3871	C20262	Zerumbone	0.00356748	DOWN	1.95918e+07	1.07585e+07	1.83653e+07	1.32706e+07	1.03011e+07	1.7402e+07	1.13015e+07	1.73361e+07	3.40476e+07	1.97209e+07	2.70532e+07	7.90084e+07	2.78538e+07	6.09769e+07	3.14987e+07	1.44168e+07	4.78139e+07	7.22714e+07	1.9553e+07	3.93644e+07	0.409936	-1.28653	1.72095e+07	4.1981e+07	2.19054	HMDB0245523	Lipids and lipid-like molecules	Prenol lipids
POS3343	C00612	N1-Acetylspermidine	0.00430625	UP	1.08898e+08	9.67866e+07	9.57939e+07	7.57892e+07	6.56958e+07	8.37261e+07	4.849e+07	3.43747e+07	7.24845e+07	1.08693e+08	3.75335e+07	4.40353e+07	6.42865e+07	3.54176e+07	3.46052e+07	4.25035e+07	4.46687e+07	5.85904e+07	7.56713e+07	5.94467e+07	1.59178	0.670642	7.90731e+07	4.96759e+07	2.15681	HMDB0001276	Organic acids and derivatives	Carboximidic acids and derivatives
POS13099	---	{[(2S,3R,4E)-3-hydroxy-2-octadecanamidooctadec-4-en-1-yl]oxy}[2-(trimethylazaniumyl)ethoxy]phosphinic acid	0.00278993	DOWN	3.7182e+06	2.49368e+06	3.44812e+06	3.97652e+06	6.73675e+06	1.56221e+07	1.87361e+07	1.31296e+07	6.59337e+06	1.51944e+07	7.74154e+07	9.90999e+07	5.74723e+07	2.84304e+07	3.11211e+07	2.43149e+07	1.46355e+07	2.48165e+07	2.38577e+07	2.27088e+07	0.221973	-2.17154	8.96489e+06	4.03873e+07	2.24439	---	Lipids and lipid-like molecules	Sphingolipids
POS979	---	3-Aminopicolinaldehyde	0.00374403	DOWN	1.44455e+08	1.34868e+08	2.33402e+08	1.97367e+08	1.42125e+08	1.60664e+08	2.63635e+08	1.28707e+08	4.70388e+08	2.15675e+08	2.98195e+08	3.85185e+08	1.51577e+08	1.05224e+09	7.76458e+08	6.15151e+08	4.98428e+08	3.95102e+08	4.94871e+08	3.53513e+08	0.416531	-1.26351	2.09128e+08	5.02072e+08	2.19176	HMDB0245820	Organoheterocyclic compounds	Pyridines and derivatives
POS1005	---	2-Hydroxy-4-imino-2,5-cyclohexadienone	0.00448661	UP	1.31478e+08	8.98259e+07	1.07523e+08	1.34175e+08	1.36105e+08	1.03009e+08	1.52511e+08	1.31471e+08	9.21168e+07	1.48933e+08	9.19995e+07	9.55695e+07	8.16753e+07	9.65796e+07	9.33871e+07	1.30153e+08	9.01893e+07	8.68754e+07	1.01459e+08	8.81753e+07	1.28354	0.360132	1.22715e+08	9.56063e+07	2.1499	HMDB0031713	Organic nitrogen compounds	Organonitrogen compounds
POS7291	---	(2E)-2-Propylpent-2-Enoylcarnitine	0.00392907	UP	4.04767e+09	1.65175e+09	2575797108	3.55833e+09	3.44922e+09	5.45624e+09	8.27761e+08	8.15168e+08	2.22681e+09	1.1891e+09	6.94951e+08	6.82693e+08	8.68016e+08	1.22818e+09	1.03e+09	1.086e+09	1.02451e+09	4.94072e+08	1.48699e+09	8.56765e+08	2.7293	1.44853	2.57978e+09	9.45218e+08	2.17946	HMDB0241902	Lipids and lipid-like molecules	Fatty Acyls
POS10723	C05466	Chenodeoxyglycocholic acid	0.0045004	DOWN	8.77454e+06	1.00945e+07	2.36343e+06	2.52148e+07	7.92337e+06	1.4119e+07	4.99778e+07	1.64527e+07	1.82948e+07	6.01937e+07	1.15521e+07	5.17615e+06	7.7395e+07	6.58432e+07	5.72458e+07	1.32977e+08	1.04166e+08	1.01265e+08	5.68249e+07	5.38739e+07	0.32028	-1.64259	2.13409e+07	6.66319e+07	2.15831	HMDB0006898	Lipids and lipid-like molecules	Steroids and steroid derivatives
POS1866	---	5-Butyl-2-methylpyridine	0.00546644	UP	2.57272e+09	2.63169e+09	1.74988e+09	2.17355e+09	2.33001e+09	1.99905e+09	2.55144e+09	3.54811e+09	2.1773e+09	3.57588e+09	1.38727e+09	1.52118e+09	2.18245e+09	1.96518e+09	1.54627e+09	1.52887e+09	2.12239e+09	2.53523e+09	1.77464e+09	1.65272e+09	1.3894	0.474464	2.53096e+09	1.82162e+09	2.11257	HMDB0246758	Organoheterocyclic compounds	Pyridines and derivatives
POS6878	---	2-Ethylpropanedioylcarnitine	0.00605576	UP	9.53819e+08	1.12158e+09	1.36589e+09	1.77978e+09	1893846200	2.49055e+09	1.62143e+09	2.28302e+09	2.54112e+09	1.95388e+09	1.21154e+09	3.44202e+08	1.53291e+09	5.46889e+08	1.24278e+09	2.0854e+09	9.02054e+08	1.05005e+09	1.0911e+09	7.12593e+08	1.67964	0.74815	1.80049e+09	1.07195e+09	2.0902	HMDB0241868	Lipids and lipid-like molecules	Fatty Acyls
POS12439	---	LPC(20:4)	0.00899177	DOWN	1.59132e+06	3.02259e+06	3.06708e+06	811068	325986	250493	189211	1.33398e+06	3.54697e+06	1.08243e+06	671435	1.68995e+06	702380	8.56712e+07	6.46795e+07	4.06412e+07	1.48496e+08	1.91537e+08	7.38327e+07	1.51141e+07	0.0244306	-5.35517	1.52211e+06	6.23036e+07	2.00793	HMDB0010396	Lipids and lipid-like molecules	Glycerophospholipids
POS7425	C01227	Dehydroepiandrosterone	0.00495037	DOWN	2.34255e+07	3.15131e+07	2.04736e+07	3.95173e+07	4.47058e+07	4.03406e+07	4.36143e+07	4.29604e+07	7.99574e+07	7.84119e+07	9.05552e+07	1.12961e+08	1.83095e+08	1.32671e+08	2.00595e+08	6.15711e+07	5.18531e+07	5.13151e+07	2.70956e+08	6.86407e+07	0.363433	-1.46024	4.4492e+07	1.22421e+08	2.12909	HMDB0000077	Lipids and lipid-like molecules	Steroids and steroid derivatives
POS13111	---	PC(18:1/14:0)	0.00764763	DOWN	1.22226e+07	2.42652e+07	4.13635e+07	1.73043e+07	2.12222e+07	2.22011e+07	1.73085e+07	1.69074e+07	3.7116e+06	9.85603e+06	3.18597e+07	4.90951e+07	6.13578e+07	4.25159e+07	4.54299e+07	4.02736e+07	5.45635e+07	2.81038e+07	1.18928e+07	9.79772e+06	0.497112	-1.00836	1.86362e+07	3.7489e+07	2.04508	HMDB0008097	Lipids and lipid-like molecules	Glycerophospholipids
POS1389	---	Cumidine	0.00799325	UP	2.24762e+09	1.67734e+09	1.48048e+09	1.91916e+09	2.11158e+09	1.76107e+09	2.21058e+09	2.55518e+09	1.90193e+09	3.12896e+09	1.20614e+09	1.22493e+09	1.92401e+09	1.67615e+09	1.31873e+09	1.3036e+09	1.8622e+09	2.20949e+09	1.13723e+09	1.46457e+09	1.36973	0.453889	2.09939e+09	1.53271e+09	2.03888	HMDB0062481	Benzenoids	Benzene and substituted derivatives
POS508	C08057	DL-Cycloserine	0.0113878	UP	8.49474e+08	9.5868e+08	1.01517e+09	8.04619e+08	9.85759e+08	7.79879e+08	1.06105e+09	9.25429e+08	9.77462e+08	1.28208e+09	7.01743e+08	8.56538e+08	7.48331e+08	558959627	5.47398e+08	8.86147e+08	6.29342e+08	8.28534e+08	1.00725e+09	9.50303e+08	1.24954	0.321392	9.6396e+08	7.71455e+08	1.98093	HMDB0014405	Organoheterocyclic compounds	Azolines
POS13646	---	PC(18:0/18:2)	0.0110333	DOWN	5.00667e+07	4.35283e+07	3.31863e+07	2.79405e+07	4.41352e+07	3.7428e+07	5.5934e+07	4.58016e+07	4.78613e+07	2.56922e+07	8.27448e+07	1.22472e+08	1.18774e+08	1.28455e+08	2.17982e+08	1.24027e+08	5.43043e+08	1.34853e+08	8.10365e+07	9.88925e+07	0.249095	-2.00523	4.11574e+07	1.65228e+08	1.96344	HMDB0008039	Lipids and lipid-like molecules	Glycerophospholipids
POS6824	---	Lauryldiethanolamine	0.00882662	UP	2.86177e+07	3.97758e+07	2.95013e+07	7.47783e+07	2.78205e+07	2.34814e+07	2.69568e+07	3.26693e+07	2.58801e+07	3.60205e+07	3.09168e+06	4.39797e+06	8.07889e+06	8.79565e+06	7.26825e+06	2.84955e+07	1.14144e+07	26440910	2.35465e+07	4.12584e+07	2.1224	1.0857	3.45502e+07	1.62788e+07	2.01166	---	Organic nitrogen compounds	Organonitrogen compounds
POS754	C00300	Creatine	0.011988	UP	2.7889e+09	2.64448e+09	1.34125e+09	2.3706e+09	2.80378e+09	2.5475e+09	2.70581e+09	1.80932e+09	1.82779e+09	2.69655e+09	9.35865e+08	5.68419e+08	1.10212e+09	1.15004e+09	1.93395e+09	2.66168e+09	9.42024e+08	1.09298e+09	1.74118e+09	3.00149e+09	1.55561	0.637481	2.3536e+09	1.51297e+09	1.95946	HMDB0000064	Organic acids and derivatives	Carboxylic acids and derivatives
POS1387	---	3-(2-Methylpropyl)pyridine	0.00945034	UP	5.34907e+08	6.00005e+08	9.53994e+08	4.66086e+08	1.25124e+09	7.02301e+08	7.63684e+08	2.48094e+09	5.94277e+08	5.39292e+08	3.01164e+08	4.24371e+08	2.30819e+08	4.23618e+08	3.1248e+08	2.09506e+08	4.55078e+08	3.25406e+08	2.55111e+08	3.18912e+08	2.72895	1.44834	8.88672e+08	3.25646e+08	1.99695	HMDB0037287	Organoheterocyclic compounds	Pyridines and derivatives
POS6624	C00473	Retinol	0.0167821	DOWN	3.74188e+07	2.53379e+07	6.0022e+07	5.00595e+07	5.52072e+06	2.94818e+07	3.6679e+07	7.73299e+06	6.28548e+07	5.58217e+07	5.87491e+07	5.54742e+07	2.37498e+07	1.26195e+08	1.42224e+08	1.22353e+08	3.02326e+08	1.93502e+08	8.58748e+07	9.96635e+06	0.331064	-1.59482	3.70929e+07	1.12041e+08	1.87129	HMDB0000305	Lipids and lipid-like molecules	Prenol lipids
POS2945	---	4-Hexylaniline	0.0132659	UP	1.54131e+08	1.69217e+08	1.03995e+08	1.35325e+08	1.43421e+08	1.08884e+08	1.39636e+08	2.36598e+08	1.19148e+08	1.89252e+08	7.88234e+07	9.97168e+07	1.36233e+08	1.19286e+08	9.40185e+07	1.02118e+08	1.23364e+08	1.52822e+08	7.87801e+07	1.08002e+08	1.3718	0.456074	1.49961e+08	1.09316e+08	1.92189	---	Benzenoids	Benzene and substituted derivatives
POS2081	---	3-Ethyl-5-hydroxy-4,5-dimethyl-pyrrolin-2-one	0.0148541	DOWN	1.12146e+07	1.75258e+07	1.38503e+07	1.2015e+07	2.49527e+07	3.07876e+07	2.41511e+07	5.10728e+07	2.28533e+07	3.69177e+07	4.64945e+07	8.51823e+07	7.49133e+07	1.03466e+08	6.26119e+07	4.09641e+07	4.75791e+07	3.0738e+08	5.38958e+07	1.0268e+08	0.265186	-1.91493	2.45341e+07	9.25167e+07	1.90088	HMDB0253169	Organoheterocyclic compounds	Pyrrolines
POS11980	C04102	LPC(16:0)	0.0131413	DOWN	2.2972e+07	3.86108e+07	3.02543e+07	1.60458e+07	1.56165e+07	1.51118e+07	1.83785e+07	2.27518e+07	5.74736e+07	2.43873e+07	1.31899e+07	1.07437e+07	1.05501e+07	7.91184e+08	4.76986e+08	2.43877e+09	1.18807e+09	1.33797e+09	6.4999e+08	130650299	0.0371167	-4.75179	2.61602e+07	7.04811e+08	1.94593	HMDB0010382	Lipids and lipid-like molecules	Glycerophospholipids
POS12213	---	LPC(18:2)	0.0130102	DOWN	3.61606e+06	4.14322e+06	5.27771e+06	1.61733e+06	2.72014e+06	2.23402e+06	2.44826e+06	3.08447e+06	1.18527e+07	4.2708e+06	768833	821521	288733	3.04659e+08	1.99561e+08	9.72312e+08	4.20989e+08	5.18379e+08	2.58361e+08	4.61801e+07	0.0151579	-6.04378	4.12647e+06	2.72232e+08	1.94983	HMDB0010386	Lipids and lipid-like molecules	Glycerophospholipids
POS13095	C00550	SM(d18:0/18:1)	0.0124217	DOWN	4.57879e+06	4.15652e+06	2.59303e+06	3.18659e+06	9.51507e+06	1.26593e+07	9.42759e+06	1.61918e+07	7.96456e+06	1.14734e+07	2.2579e+08	1.51094e+08	9.87555e+07	1.28123e+08	3.14079e+07	1.52544e+07	2.46078e+07	2.7975e+07	1.37651e+07	1.62721e+07	0.111517	-3.16467	8.17466e+06	7.33045e+07	1.93738	HMDB0012088	Lipids and lipid-like molecules	Sphingolipids
NEG3817	C02076	Sedoheptulose	0.0106341	DOWN	7.30064e+07	5.67731e+07	7.31935e+07	6.59549e+07	8.53958e+07	7.78363e+07	5.126e+07	5.75869e+07	7.2278e+07	7.5556e+07	1.53071e+08	7.17136e+07	1.35434e+08	1.10283e+08	1.33063e+08	1.08627e+08	6.55623e+07	6.61903e+07	7.24874e+07	8.17348e+07	0.690106	-0.535111	6.88841e+07	9.98167e+07	1.97272	HMDB0003219	Organic oxygen compounds	Organooxygen compounds
POS93	---	2-Cyclopenten-1-one	0.0193079	UP	9.07344e+07	9.27496e+07	6.65079e+07	1.57157e+08	1.51081e+08	1.18743e+08	5.9594e+07	1.05198e+08	6.95282e+07	8.69009e+07	5.10771e+07	3.33157e+07	8.16353e+07	9.67633e+07	9.43329e+07	8.17046e+07	4.17162e+07	7.25392e+07	5.39121e+07	6.45788e+07	1.48635	0.571772	9.98194e+07	6.71575e+07	1.84739	HMDB0245092	Organic oxygen compounds	Organooxygen compounds
POS6351	---	3-Hydroxyisovalerylcarnitine	0.0264158	UP	2.71575e+09	2.66799e+09	3.17832e+09	2.58189e+09	2.88748e+09	2.42367e+09	2288130892	2.62722e+09	2331745348	3.49365e+09	2.86334e+09	2.80221e+09	2.31569e+09	1.96059e+09	2.41305e+09	2.20457e+09	1.68984e+09	1891381184	2.53323e+09	2.40868e+09	1.1782	0.236584	2.71959e+09	2.30826e+09	1.75176	HMDB0061189	Lipids and lipid-like molecules	Fatty Acyls
POS8445	C12144	Phytosphingosine	0.0168811	DOWN	4.92551e+07	5.44268e+07	4.14977e+07	6.34452e+07	4.04315e+07	2.88474e+07	4.45845e+07	5.61529e+07	4.3378e+07	5.03136e+07	3.07123e+07	1.83556e+07	5.21477e+07	1.67917e+08	1.2777e+08	4.15296e+08	2.41003e+08	2.54065e+08	1.20985e+08	7.6903e+07	0.31381	-1.67204	4.72333e+07	1.50515e+08	1.8821	HMDB0004610	Organic nitrogen compounds	Organonitrogen compounds
POS1888	---	4-Hydroxy-1-methyl-2-oxo-1,2-dihydropyridine-3-carbonitrile	0.0162105	UP	1.14578e+07	3.14092e+07	2.85736e+07	4.02171e+07	3.01131e+07	3.52313e+07	7.7951e+07	3.75037e+07	5.2084e+07	9.17658e+07	9.9267e+06	1.07086e+07	1.02973e+07	7.7919e+06	2.41236e+07	2.97697e+07	4.78006e+07	2.74093e+07	24410875	1.54802e+07	2.10047	1.07071	4.36306e+07	2.07719e+07	1.87826	---	Organoheterocyclic compounds	Pyridines and derivatives
POS5729	C06082	Abscisic acid	0.0170312	DOWN	2.13966e+07	2.91405e+07	4.27288e+07	3.89717e+07	2.58104e+07	2.39131e+07	5.38183e+07	2.47007e+07	1.97145e+07	7.0148e+06	6.18111e+07	7.20442e+07	1.56878e+08	3.18712e+07	1.24518e+08	2.80142e+07	3.29712e+07	3.82922e+07	3.23516e+07	1.02141e+08	0.421813	-1.24532	2.87209e+07	6.80892e+07	1.86222	HMDB0036093	Lipids and lipid-like molecules	Prenol lipids
POS5262	---	Walleminone	0.020888	DOWN	2.29473e+07	3.17998e+07	3.54583e+07	5.10941e+07	4.64114e+07	6.49831e+07	4.14667e+07	4.56408e+07	3.34445e+07	3.48223e+07	4.44114e+07	4.78604e+07	3.43857e+07	5.83887e+07	4.76976e+07	8.96103e+07	6.43957e+07	6.67072e+07	6.47391e+07	4.71423e+07	0.721812	-0.470305	4.08068e+07	5.65338e+07	1.84581	---	Lipids and lipid-like molecules	Prenol lipids
POS11960	---	LPC(16:1)	0.0188232	DOWN	425152	731407	326492	325333	267181	552852	166376	235654	567897	161557	171335	178957	3375.61	1.87834e+07	2.23044e+07	8.48865e+07	3.87945e+07	4.00662e+07	1.29621e+07	3.72378e+06	0.0169461	-5.88291	375990	2.21875e+07	1.86323	HMDB0010383	Lipids and lipid-like molecules	Glycerophospholipids
POS7338	---	Anticopalic Acid	0.0254428	DOWN	1.98167e+07	1.55567e+07	2.9596e+07	3.17413e+07	1.23012e+07	1.29938e+07	1.94983e+07	2.44465e+07	4.92686e+07	3.43646e+07	4.40057e+07	3.81265e+07	1.92152e+07	5.15473e+07	4.50105e+07	5.90075e+07	1.49816e+08	9.48108e+07	3.47868e+07	2.59383e+07	0.44389	-1.17173	2.49584e+07	5.62265e+07	1.76192	---	Lipids and lipid-like molecules	Prenol lipids
POS5325	---	Oxyglutinosone	0.0240456	UP	1.39091e+08	1.79775e+08	1.80359e+08	3.70474e+08	3.43291e+08	2.9174e+08	2.85238e+08	3.17485e+08	8.09876e+08	5.02325e+08	1.43247e+08	2.60153e+08	1.34104e+08	1.55798e+08	2.17657e+08	2.35386e+08	2.16727e+08	1.46483e+08	2.07228e+08	1.32621e+08	1.84906	0.88679	3.41965e+08	1.8494e+08	1.79366	HMDB0302978	Organic oxygen compounds	Organooxygen compounds
POS7476	C00294	Inosine	0.0204409	DOWN	8.40903e+06	2.66792e+06	1.67943e+06	7.50651e+06	4.15492e+06	2.68698e+06	2.30216e+06	1.79425e+06	706200	5.60822e+06	1.26172e+07	4.68353e+06	1.34054e+07	5.77577e+07	3.02814e+07	1.96903e+07	2.0068e+07	1.13352e+07	746865	3.17048e+06	0.21591	-2.2115	3.75156e+06	1.73756e+07	1.85581	HMDB0000195	Nucleosides, nucleotides, and analogues	Purine nucleosides
POS906	---	Isoindoline	0.0275651	UP	8.41916e+09	9.45357e+09	9.46441e+09	7.55458e+09	9.35991e+09	7.57628e+09	1.07291e+10	8.97877e+09	9.75015e+09	1.25155e+10	7.37103e+09	8.89615e+09	7.73848e+09	5.1499e+09	5.56079e+09	8.93867e+09	6.3384e+09	8.13224e+09	9.85407e+09	9.28557e+09	1.21402	0.27979	9.38015e+09	7.72653e+09	1.77678	HMDB0253648	Organoheterocyclic compounds	Isoindoles and derivatives
POS9027	---	Erucamide	0.0221815	DOWN	8.16885e+07	8.60745e+07	6.3305e+07	7.34777e+07	5.95372e+07	6.01422e+07	7.8017e+07	1.33855e+08	8.11316e+07	1.39036e+08	4.5279e+07	8.08635e+07	8.56613e+07	2.68088e+08	1.6175e+08	4.57914e+08	3.76325e+08	3.46812e+08	1.48787e+08	7.20204e+07	0.419018	-1.25492	8.56264e+07	2.0435e+08	1.80378	HMDB0244507	Lipids and lipid-like molecules	Fatty Acyls
POS1800	---	5,6,7,8-Tetrahydro-4-methylquinoline	0.0206384	UP	5.12962e+07	4.85049e+07	3.95465e+07	7.30155e+07	6.02395e+07	4.04423e+07	5.76272e+07	8.28471e+07	6.20078e+07	7.71737e+07	2.91003e+07	4.72561e+07	4.36361e+07	6.56109e+07	3.56504e+07	2.66582e+07	5.26881e+07	5.89741e+07	3.43271e+07	4.12939e+07	1.36192	0.445641	5.92701e+07	4.35195e+07	1.84923	HMDB0029709	Organoheterocyclic compounds	Quinolines and derivatives
POS3037	C05584	Vanilmandelic acid	0.0160454	UP	4.28069e+07	1.27796e+08	7.80338e+07	5.74165e+07	7.61965e+07	2.09156e+07	1.85712e+08	1.01896e+08	1.23103e+08	7.36928e+07	5.2788e+07	5.17603e+07	2.92472e+07	1.69883e+07	1.98967e+07	5.54343e+07	1.04327e+08	4.19142e+07	2.15396e+07	3.82066e+07	2.05407	1.03849	8.87569e+07	4.32102e+07	1.8803	HMDB0000291	Benzenoids	Phenols
POS8002	---	2-(3-carboxypropanoylamino)-3-indol-3-ylpropanoic acid	0.0252267	UP	3.83016e+07	4.41056e+07	5.91135e+07	8.21573e+07	7.58728e+07	5.5781e+07	3.39125e+07	3.53344e+07	4.88719e+07	39588052	2.38849e+07	5.17922e+07	2.84525e+07	3.39315e+07	4.72083e+07	3.63887e+07	28479615	3.10387e+07	4.36148e+07	4.05052e+07	1.40444	0.49	5.13039e+07	3.65296e+07	1.76957	---	Organic acids and derivatives	Carboxylic acids and derivatives
POS5018	---	Prolylleucine	0.0175974	UP	8.45359e+09	7.2401e+09	7.657e+09	1.27135e+10	1.0429e+10	7.95419e+09	1.85215e+10	9.32683e+09	1.55143e+10	1.32023e+10	3.68407e+09	3.82022e+09	7.37218e+09	6.47273e+09	2.89825e+09	3.69429e+09	6.12133e+09	1.59597e+10	7.34717e+09	9.04015e+09	1.67162	0.741245	1.11012e+10	6.64101e+09	1.86256	HMDB0253028	Organic acids and derivatives	Carboxylic acids and derivatives
POS446	---	1-Pyrrolidinecarboxaldehyde	0.0203669	DOWN	4.82821e+07	4.44257e+07	6.52761e+07	7.49577e+07	4.42979e+07	5.03131e+07	5.56482e+07	6.2055e+07	4.09341e+09	4.7468e+09	3.30049e+08	1.22293e+09	5.55944e+09	3.26562e+09	5.50484e+09	1.76239e+09	2.22545e+09	1.06989e+10	4.60276e+09	2.51196e+09	0.246401	-2.02092	9.28547e+08	3.76844e+09	1.81794	HMDB0034587	Organoheterocyclic compounds	Pyrrolidines
NEG4217	C00864	Pantothenic acid	0.0373734	UP	3.55394e+08	4.22781e+08	3.57998e+08	2.20751e+08	4.44807e+08	3.24321e+08	4.11802e+08	4.15336e+08	5.23393e+08	8.30342e+08	3.23876e+08	3.6527e+08	3.83879e+08	7.22148e+07	1.22477e+08	3.57142e+08	1.99016e+08	3.29425e+08	4.11881e+08	3.25935e+08	1.48971	0.575031	4.30692e+08	2.89112e+08	1.67354	HMDB0000210	Organic acids and derivatives	Carboxylic acids and derivatives
POS8232	---	2-trans,4-cis-Decadienoylcarnitine	0.0258545	DOWN	1.04306e+09	5.87655e+08	2.3201e+08	1.47834e+08	2.33503e+08	1.38226e+08	8.98537e+07	1.7807e+08	7.42537e+07	5.47949e+07	3.12542e+09	4.73658e+08	3.81157e+08	3.8768e+09	1.37029e+09	4.33527e+08	1.48802e+09	2.63699e+08	9.69665e+08	3.7311e+08	0.21789	-2.19833	2.77926e+08	1.27553e+09	1.78552	HMDB0013325	Lipids and lipid-like molecules	Fatty Acyls
POS10741	---	(1S,2R,4aR,8aR)-1-Acetoxy-7-isopropylidene-1,4a-dimethyl-6-oxodecahydro-2-naphthalenyl 2,3-dimethyl-2-oxiranecarboxylate	0.0268256	DOWN	7.59976e+06	8.1217e+06	1.04939e+07	5.54233e+06	6.01541e+06	5.18317e+06	6.678e+06	6.07723e+06	4.93762e+06	4.79958e+06	4.42978e+06	3.52913e+06	4.22057e+06	1.60344e+07	1.50337e+07	4.72622e+07	3.26838e+07	2.83436e+07	1.52747e+07	9.07246e+06	0.372112	-1.42619	6.54487e+06	1.75884e+07	1.76888	---	Lipids and lipid-like molecules	Prenol lipids
POS1118	C04092	1-Piperideine-2-carboxylic acid	0.0301014	DOWN	1.27372e+08	5.83267e+07	6.71094e+07	9.3456e+07	7.34277e+07	1.24488e+08	1.51635e+08	1.95902e+08	1.05256e+08	9.20622e+07	2.55246e+08	8.27117e+07	1.87566e+08	1.57477e+08	9.76434e+07	1.05869e+08	1.70598e+08	1.39392e+08	1.86138e+08	2.43353e+08	0.669766	-0.578272	1.08904e+08	1.62599e+08	1.73073	HMDB0001084	Organoheterocyclic compounds	Pyridines and derivatives
POS2935	---	2-Benzimidazolecarbamic acid	0.0320491	UP	5.41126e+08	4.59184e+08	4.05712e+08	1.8449e+08	2.53116e+08	2.87715e+08	2.29285e+08	2.04356e+08	1.85871e+08	4.43972e+08	1.69504e+08	2.49918e+08	2.27974e+08	3.171e+08	2.40069e+08	1.99188e+08	1.84382e+08	1.9095e+08	1.8017e+08	2.20074e+08	1.46597	0.551854	3.19483e+08	2.17933e+08	1.7041	HMDB0248994	Organoheterocyclic compounds	Benzimidazoles
POS7244	C01762	Xanthosine	0.0311986	UP	8.08011e+07	7.09372e+07	5.51874e+07	9.75265e+07	1.32742e+08	7.97391e+07	9.35135e+07	1.15266e+08	1.03134e+08	1.16616e+08	5.05837e+07	5.97726e+07	6.57225e+07	3.28604e+07	3.28429e+07	7.84172e+07	1.02702e+08	9.65303e+07	9.18815e+07	7.99568e+07	1.36772	0.451771	9.45463e+07	6.9127e+07	1.7215	HMDB0000299	Nucleosides, nucleotides, and analogues	Purine nucleosides
NEG10330	C18525	Methoxyfenozide	0.0381345	DOWN	1.31208e+07	1.048e+07	1.71362e+07	1.34347e+07	9.77865e+06	1.17643e+07	9.44375e+06	14554279	6.4604e+06	6.39382e+06	1.61958e+07	2.29608e+07	2.27303e+07	1.69701e+07	2.06267e+07	3.91072e+07	8.40192e+07	8.73847e+07	7.29329e+06	6.05242e+06	0.348137	-1.52227	1.12567e+07	3.23341e+07	1.6505	HMDB0254547	Benzenoids	Benzene and substituted derivatives
NEG607	---	Levulinic acid	0.0335945	UP	2.40193e+08	1.55712e+08	2.34533e+08	3.26379e+08	3.89186e+08	1.93125e+08	5.04809e+08	3.97037e+08	4.09422e+08	4.49425e+08	1.91783e+08	1.55594e+08	1.46495e+08	1.24024e+08	2.3189e+08	4.98696e+08	1.87917e+08	2.11882e+08	2.46821e+08	1.40412e+08	1.54521	0.627803	3.29982e+08	2.13552e+08	1.68926	HMDB0000720	Organic acids and derivatives	Keto acids and derivatives
POS1701	C19434	Oxyquinoline	0.0434682	UP	1.87869e+08	1.12342e+08	1.48392e+08	1.21045e+08	1.41478e+08	1.38142e+08	1.58929e+08	1.52847e+08	1.69505e+08	3.77788e+08	1.11613e+08	1.05167e+08	1.23965e+08	1.08404e+08	1.02349e+08	1.25278e+08	1.19011e+08	1.21091e+08	1.38174e+08	1.26051e+08	1.44639	0.532459	1.70834e+08	1.1811e+08	1.61081	---	Organoheterocyclic compounds	Quinolines and derivatives
POS335	C02502	2-Hydroxypyridine	0.0458398	UP	3.24035e+08	2.78553e+08	2.71433e+08	3.11138e+08	3.23841e+08	2.67356e+08	2.88815e+08	2.80295e+08	3.28354e+08	3.7759e+08	2.36298e+08	2.66898e+08	2.02598e+08	2.67116e+08	2.71734e+08	2.91226e+08	1.94935e+08	1.71543e+08	3.19591e+08	3.64558e+08	1.17975	0.238476	3.05141e+08	2.5865e+08	1.60325	HMDB0013751	Organoheterocyclic compounds	Pyridines and derivatives
POS7194	C08432	2-Hydroxyadenosine	0.0320218	DOWN	1.86342e+07	2.41373e+07	1.80801e+07	3.74213e+07	3.41423e+07	3.3152e+07	1.04364e+07	862738	2.49677e+07	7.99086e+06	2.14769e+07	2.82918e+07	3.63915e+07	1.65265e+09	1.04349e+09	5.93504e+08	5.11717e+08	2.21949e+08	7.30586e+07	5.36394e+07	0.0495318	-4.3355	2.09825e+07	4.23617e+08	1.7316	---	Nucleosides, nucleotides, and analogues	Purine nucleosides
POS231	---	2-Aminobutan-1-ol	0.0361775	DOWN	2.4894e+07	2.87507e+07	2.79554e+07	1.58364e+07	2.26933e+07	2.09739e+07	1.96375e+07	1.64748e+07	4.94184e+07	4.72893e+07	2.78859e+07	3.85399e+07	3.25518e+07	3.76737e+07	4.02194e+07	4.99265e+07	1.08189e+08	2.09531e+08	9.0281e+07	4.90888e+07	0.400539	-1.31998	2.73924e+07	6.83887e+07	1.67104	HMDB0245012	Organic nitrogen compounds	Organonitrogen compounds
POS805	---	N-(3-Methylbutyl)acetamide	0.0398599	UP	1.11205e+09	1.91403e+09	2.07453e+09	2.01286e+09	2.18728e+09	2.30272e+09	1.79056e+09	1.82618e+09	4.03119e+09	3.63511e+09	8.0456e+08	1.66943e+09	1.65446e+09	1.15438e+09	1.28728e+09	1.44699e+09	1.92683e+09	1.16952e+09	1470756015	2.9269e+09	1.47549	0.561195	2.28865e+09	1.55111e+09	1.63738	HMDB0031651	Organic acids and derivatives	Carboxylic acids and derivatives
POS12261	---	LPC(18:0)	0.0410686	DOWN	2.96184e+06	4.40179e+06	2.80111e+06	8.03493e+06	4.08556e+06	5.1568e+06	5.02186e+06	6.18483e+06	3.56718e+06	1.31315e+07	3.94996e+06	5.73129e+06	5.32363e+06	6.45833e+06	6.5687e+07	6.13999e+07	3.69316e+08	1.51888e+08	6.69496e+07	9.52262e+07	0.0665289	-3.90987	5.53474e+06	8.3193e+07	1.63112	HMDB0010384	Lipids and lipid-like molecules	Glycerophospholipids
NEG1783	C00651	L-2-Amino-4-methylenepentanedioic acid	0.0344026	DOWN	8.87665e+06	814437	4.12436e+06	1.5225e+07	2.03888e+07	1.993e+07	1.56212e+07	2.03407e+07	1.41072e+07	2.26694e+07	2.08792e+06	4.19309e+06	2.39339e+07	2.43209e+07	4.37073e+07	3.07213e+07	4.77971e+07	3.33326e+07	2.80921e+07	2.27555e+07	0.544557	-0.876844	1.42098e+07	2.60942e+07	1.67898	HMDB0029433	Organic acids and derivatives	Carboxylic acids and derivatives
POS1923	---	8-Oxo-7,8-dihydrodeoxyguanine	0.0345648	DOWN	1.87059e+06	3.48162e+06	4.22461e+06	5.38543e+07	5.34204e+06	6.9721e+06	2.07467e+06	4.79376e+06	5.98521e+07	4.98967e+07	3.01814e+07	3.21091e+07	6.08896e+07	2.11035e+09	1.38468e+09	628596730	5.46511e+08	2.74791e+08	1.01566e+08	8.3368e+07	0.0366192	-4.77125	1.92362e+07	5.25304e+08	1.71637	HMDB0247457	Organoheterocyclic compounds	Imidazopyrimidines
POS8266	---	Dydrogesterone	0.0340564	DOWN	1.25786e+08	6.06882e+07	3.32579e+07	1.79187e+07	3.98304e+07	2.24129e+07	7.1368e+07	5.69964e+07	3.28138e+07	5.93134e+07	4.84297e+08	3.84779e+07	6.48531e+07	5.82147e+08	2.01138e+08	1.12266e+08	1.90882e+08	5.32877e+07	1.31219e+08	5.81934e+07	0.271492	-1.88102	5.20386e+07	1.91676e+08	1.70984	HMDB0014522	Lipids and lipid-like molecules	Steroids and steroid derivatives
POS2462	C00079	Phenylalanine	0.0294354	UP	6.66728e+08	7.53771e+08	7.00101e+08	4.42677e+08	5.46955e+08	5.36819e+08	7.3364e+08	6.50809e+08	2.9731e+08	5.29412e+08	5.65377e+08	7.91007e+08	3.87366e+08	3.52476e+08	3.85877e+08	1.63097e+08	3.33044e+08	4.31596e+08	4.63219e+08	3.48333e+08	1.38775	0.472744	5.85822e+08	4.22139e+08	1.72145	HMDB0000159	Organic acids and derivatives	Carboxylic acids and derivatives
POS1894	---	3-Methoxy-4-hydroxyphenylethanol	0.0268125	DOWN	5.03676e+06	6.33495e+06	1.03056e+07	5.20185e+06	6.73236e+06	2.81662e+07	3.88655e+06	5.11991e+06	1.13243e+08	7.15294e+07	3.97836e+07	4.68175e+07	3.84792e+07	4.1161e+07	4.08663e+07	7.66807e+07	5.37927e+07	6.35028e+07	8.26065e+07	9.99101e+07	0.437897	-1.19134	2.55557e+07	5.836e+07	1.76658	HMDB0038925	Benzenoids	Phenols
POS3609	---	Dodecatrienoic acid	0.0392117	UP	3.85378e+07	1.18595e+08	6.03764e+07	1.05384e+08	1.39162e+08	9.83729e+07	6.63041e+07	1.36759e+08	5.52655e+07	7.49791e+07	7.11889e+07	2.32273e+07	3.33392e+07	8.89311e+07	7.37983e+07	1.05494e+08	4.43354e+07	6.98573e+07	1.88148e+07	4.37236e+07	1.56054	0.642043	8.93735e+07	5.7271e+07	1.64391	HMDB0302622	Lipids and lipid-like molecules	Fatty Acyls
POS1401	C00262	Hypoxanthine	0.0430122	DOWN	2.45553e+08	1.70491e+08	2.25102e+08	6.68901e+08	1.38214e+08	7.64292e+08	3.03485e+08	6.6536e+07	3.84406e+08	3.84036e+08	2.03566e+08	2.90307e+08	6.44427e+08	4054810229	2.48058e+09	1.37947e+09	1.35124e+09	8.13237e+08	3.84216e+08	3.35151e+08	0.280725	-1.83277	3.35101e+08	1.1937e+09	1.66271	HMDB0000157	Organoheterocyclic compounds	Imidazopyrimidines
POS13040	C00550	SM(d18:0/16:1)	0.0302671	UP	6.10147e+06	3.1852e+06	7.87777e+06	4.70678e+06	6.20073e+06	1.16074e+07	1.0892e+07	8.70054e+06	2.72661e+06	8.0743e+06	4.9523e+06	8.81736e+06	4.4175e+06	6.27815e+06	3.68764e+06	3.45538e+06	4.57341e+06	2.69087e+06	2.54964e+06	1.44397e+06	1.63469	0.709013	7.00728e+06	4.28662e+06	1.7164	HMDB0013464	Lipids and lipid-like molecules	Sphingolipids
POS7130	C19670	Oleamide	0.042128	DOWN	2.79744e+06	3.32484e+06	2.16839e+07	4.44603e+07	6.62972e+06	5.90468e+06	2.59469e+06	5.77535e+06	2.88566e+06	7.68321e+06	819681	1.91614e+06	2.80152e+06	4.1473e+07	3.47149e+07	1.52089e+08	9.37191e+07	9.0656e+07	3.87315e+07	8.30011e+06	0.22299	-2.16495	1.0374e+07	4.65221e+07	1.63437	HMDB0002117	Lipids and lipid-like molecules	Fatty Acyls
POS4886	C07129	Terbutaline	0.0471627	DOWN	6.02308e+06	5.7313e+06	1.39302e+07	1.32204e+07	2.31742e+07	2.15384e+07	1.55146e+07	3.59728e+07	9.87043e+06	3.56515e+06	3.0438e+07	4.77082e+07	7.48687e+07	7.4143e+07	2.60617e+07	2.01903e+07	1.85619e+07	2.44364e+08	1.35827e+07	6.39e+07	0.241994	-2.04695	1.48541e+07	6.13818e+07	1.58924	HMDB0015009	Benzenoids	Phenols
POS965	---	4-Ethylaniline	0.0277209	UP	6.67115e+09	7.16401e+09	6.82669e+09	3.16367e+09	2.19184e+09	5.31317e+09	4.51224e+09	8.87231e+09	4.37951e+09	3.29068e+09	1.58598e+09	1.10819e+09	3.38168e+09	3.25324e+09	1.35822e+09	2.78717e+09	3.06238e+09	8.37381e+09	3.20258e+09	1.84629e+09	1.74853	0.806145	5.23853e+09	2.99595e+09	1.74	HMDB0246419	Benzenoids	Benzene and substituted derivatives
POS6152	---	3'-O-Methylcytidine	0.0351066	UP	2.22682e+08	2.49082e+08	1.75877e+08	6.82978e+07	7.87395e+07	9.5708e+07	2.06243e+08	1.51076e+08	1.66665e+08	8.00529e+07	9.86493e+07	4.52535e+07	1.4269e+08	6.18936e+07	5.84654e+07	1.30342e+08	8.01694e+07	5.71082e+07	6.4834e+07	1.80979e+08	1.62369	0.69928	1.49442e+08	9.20384e+07	1.67383	---	Nucleosides, nucleotides, and analogues	Pyrimidine nucleosides
NEG2862	C08261	Azelaic acid	0.031838	UP	2.09008e+09	2.88622e+09	2.07553e+09	1.7733e+09	3.27453e+09	3.93918e+09	4.14233e+09	4.787e+09	4.9753e+08	1.21027e+09	1.44461e+09	1.2141e+09	2.00435e+09	1.77137e+09	1.1225e+09	3.0627e+09	1.38273e+09	1.64955e+09	6.07642e+08	1.19846e+09	1.7257	0.787185	2.6676e+09	1.5458e+09	1.70707	HMDB0000784	Lipids and lipid-like molecules	Fatty Acyls
NEG1559	C05852	2-Hydroxyphenylacetic acid	0.037657	UP	1.02019e+08	1.43379e+08	1.48232e+08	8.16046e+07	1.09607e+08	1.32656e+08	1.41698e+08	1.23817e+08	8.54129e+07	1.19903e+08	9.08468e+07	1.33355e+08	7.65503e+07	8.29527e+07	8.86171e+07	1.25087e+08	1.06326e+08	9.46472e+07	7.73987e+07	9.59106e+07	1.22295	0.290363	1.18833e+08	9.71691e+07	1.66797	HMDB0000669	Benzenoids	Benzene and substituted derivatives
POS1705	C04076	Allysine	0.0437798	DOWN	1.8966e+08	1.42065e+08	1.48299e+08	1.61378e+08	2.22344e+08	1.98203e+08	1.45547e+08	3.33026e+08	2.17647e+08	3.52445e+08	2.32249e+08	1.34454e+08	2.42127e+08	1.80793e+08	3.54658e+08	3.94292e+08	4.87084e+08	4.58151e+08	4.56415e+08	2.0345e+08	0.671385	-0.574788	2.11061e+08	3.14367e+08	1.62873	HMDB0303320	Organic acids and derivatives	Carboxylic acids and derivatives
POS8267	C08149	Levonorgestrel	0.0472194	DOWN	2.1071e+08	2.62539e+08	3.89054e+07	1.62544e+07	3.3058e+07	2.70494e+07	6.0399e+07	4.93412e+07	2.47429e+07	6.82482e+07	6.57975e+08	5.45385e+07	100728435	813889708	2.82267e+08	1.14327e+08	3.06542e+08	5.60631e+07	2.12573e+08	7.2136e+07	0.296232	-1.7552	7.91247e+07	2.67104e+08	1.62086	HMDB0014511	Lipids and lipid-like molecules	Steroids and steroid derivatives
POS7717	---	Nona-3,5-dienoylcarnitine	0.033357	UP	5.20092e+07	5.66432e+07	9.63143e+07	9.29441e+07	8.42651e+07	9.30198e+07	6.21226e+07	5.69666e+07	6.18077e+07	3.00471e+07	54170380	3.05107e+07	3.2696e+07	3.17504e+07	2.31604e+07	6.81292e+07	7.41656e+07	7.67632e+07	4.38358e+07	3.54771e+07	1.45783	0.543821	6.8614e+07	4.70659e+07	1.68878	HMDB0241764	Lipids and lipid-like molecules	Fatty Acyls
POS847	C00183	Valine	0.0382414	UP	4.28126e+07	4.40173e+07	5.52574e+07	4.07472e+07	3.32577e+07	2.70059e+07	4.3656e+07	6.45623e+07	3.29173e+07	3.44768e+07	2.42569e+07	4.55647e+07	3.49666e+07	2.47113e+07	1.82409e+07	3.75858e+07	3.84052e+07	4.42026e+07	2.64518e+07	5.7856e+06	1.3949	0.480166	4.1871e+07	3.00171e+07	1.64962	HMDB0000883	Organic acids and derivatives	Carboxylic acids and derivatives
POS1702	C06343	4-Hydroxyquinoline	0.0472379	UP	1.26815e+08	2.61677e+08	2.84131e+08	2.03404e+08	1.54037e+08	1.10337e+08	1.46288e+08	1.36622e+08	2.65149e+08	8.12416e+07	3.44324e+07	6.94776e+07	1.78701e+08	1.76688e+08	2.07235e+08	1.45561e+08	8.47137e+07	2.95275e+07	1.14932e+08	8.92217e+07	1.56543	0.646558	1.7697e+08	1.13049e+08	1.6626	HMDB0246466	Organoheterocyclic compounds	Quinolines and derivatives
NEG445	C01403	Anisole	0.0410366	UP	1.20939e+08	1.22853e+08	1.3788e+08	8.6753e+07	1.23079e+08	1.81702e+08	1.71829e+08	1.67876e+08	1.24485e+08	1.56373e+08	8.2476e+07	9.81486e+07	7.63404e+07	1.00621e+08	1.09257e+08	1.76308e+08	1.32126e+08	1.03854e+08	8.09378e+07	1.36528e+08	1.27099	0.345958	1.39377e+08	1.0966e+08	1.6505	HMDB0033895	Benzenoids	Phenol ethers
POS6117	---	5-butyl-3-methyl-7H-furo[3,2-g]chromen-7-one	0.0434672	UP	5.72098e+08	4.66491e+07	6.79176e+08	6.26446e+07	1.57836e+09	1.33427e+09	1.39384e+09	7.29604e+07	5.60606e+07	6.78646e+07	4.95909e+07	2.30027e+07	8.29508e+08	3.77685e+07	2.60222e+07	4.63573e+07	6.8838e+07	4.16045e+07	4.04405e+07	4.04288e+07	4.87214	2.28456	5.86392e+08	1.20356e+08	1.61082	---	Phenylpropanoids and polyketides	Coumarins and derivatives
POS6301	---	Glutamylleucine	0.0411231	UP	2.30974e+09	1.77284e+09	1.77149e+09	9.19618e+08	1.25264e+09	1.46907e+09	1.85403e+09	2.58249e+09	1.52625e+09	9.87539e+08	1.06125e+09	1.47069e+09	4.62998e+08	8.95181e+08	6.50697e+08	1.6502e+09	9.8592e+08	1.47765e+09	1.30052e+09	1.73815e+09	1.40643	0.492033	1.64457e+09	1.16933e+09	1.66865	HMDB0011171	Organic acids and derivatives	Carboxylic acids and derivatives
NEG469	C00090	Catechol	0.049708	DOWN	1.8581e+08	1.12123e+08	2.71201e+08	6.91698e+08	5.83642e+08	4.93725e+08	1.33211e+08	1.53916e+08	4.76872e+08	3.50796e+08	1.75183e+08	1.62037e+08	5.61589e+08	9.21752e+08	9.53152e+08	4.93915e+08	6.6037e+08	3.66822e+08	7.31141e+08	7.36626e+08	0.599209	-0.738869	3.45299e+08	5.76259e+08	1.58368	HMDB0000957	Benzenoids	Phenols
NEG5374	---	Polyethylene, oxidized	0.0415781	UP	2.13224e+08	2.6143e+08	1.5133e+08	8.84644e+07	1.89541e+08	2.79295e+08	2.27978e+08	3.18423e+08	3.747e+07	3.16723e+07	8.34234e+07	8.66974e+07	1.4081e+08	1.46125e+08	8.31747e+07	1.65721e+08	1.21557e+08	9.81035e+07	6.82174e+07	6.7476e+07	1.69492	0.761217	1.79883e+08	1.06131e+08	1.62554	HMDB0032472	Organic acids and derivatives	Keto acids and derivatives
POS8165	---	(2E,6E,8E)-Decatrienoylcarnitine	0.0477628	UP	3.74345e+09	4.18736e+09	4.78112e+09	3.89073e+09	6.65294e+09	1.06128e+10	4.66236e+09	6.70228e+09	4.51411e+09	1.8379e+09	2.34823e+09	1.47435e+09	2.42588e+09	4.96234e+09	3.13952e+09	5.63141e+09	3.30008e+09	3.42744e+09	4.1454e+09	2.66658e+09	1.53888	0.621878	5.1585e+09	3.35212e+09	1.5826	HMDB0241125	Lipids and lipid-like molecules	Fatty Acyls
